# Supplementary material for: Comparison of Short-Term Associations between PM2.5 Components and Mortality across Six Major Cities in South Korea
Source: PubMed Central journal article supplement (PMC6720204; doi:10.3390/ijerph16162872), 2019-08-11
Supplement: ijerph-16-02872-s001.pdf [file ijerph-16-02872-s001.pdf]

# Supplementary Materials: Comparison of Short-Term Associations between PM<sub>2.5</sub> Components and Mortality across Six Major Cities in South Korea

**Table S1.** Average areas and populations of six South Korean major cities in 2015.

| City    | Area (km <sup>2</sup> ) | Population |
|---------|-------------------------|------------|
| Seoul   | 605.3                   | 10,022,181 |
| Busan   | 769.8                   | 3,513,777  |
| Daegu   | 883.6                   | 2,487,829  |
| Gwangju | 501.2                   | 1,472,199  |
| Daejeon | 540.8                   | 1,518,775  |
| Ulsan   | 1,060.8                 | 1,173,534  |

**Table S2.** Interquartile range concentrations of PM<sub>2.5</sub> and 11 PM<sub>2.5</sub> components in six South Korean major cities from 2013 to 2015

| City    | PM <sub>2.5</sub> | EC  | OC  | NO <sub>3</sub> <sup>-</sup> | SO <sub>4</sub> <sup>2-</sup> | Pb   | Ni  | Si    | V   | Cu  | Zn    | K     |
|---------|-------------------|-----|-----|------------------------------|-------------------------------|------|-----|-------|-----|-----|-------|-------|
| Seoul   | 21.7              | 1.1 | 2.8 | 6.2                          | 6.5                           | 23.5 | 2.3 | 627.7 | 6.3 | 6.9 | 55.6  | 286.3 |
| Busan   | 16.6              | 0.7 | 3.2 | 3.1                          | 5.6                           | 19.4 | 3.8 | 443.3 | 9.7 | 6.0 | 61.8  | 214.1 |
| Daegu   | 18.1              | 0.7 | 3.5 | 3.7                          | 4.2                           | 21.2 | 1.6 | 414.9 | 2.6 | 5.9 | 124.6 | 238.2 |
| Gwangju | 19.3              | 1.4 | 2.5 | 4.3                          | 5.9                           | 25.0 | 1.6 | 698.1 | 3.9 | 3.8 | 51.5  | 294.0 |
| Daejeon | 21.4              | 1.4 | 2.4 | 6.0                          | 6.0                           | 26.7 | 1.9 | 586.5 | 3.5 | 4.4 | 51.7  | 287.7 |
| Ulsan   | 18.1              | 0.5 | 2.9 | 2.1                          | 4.7                           | 21.3 | 2.8 | 504.4 | 7.5 | 5.3 | 56.7  | 204.5 |

A. PM<sub>2.5</sub>

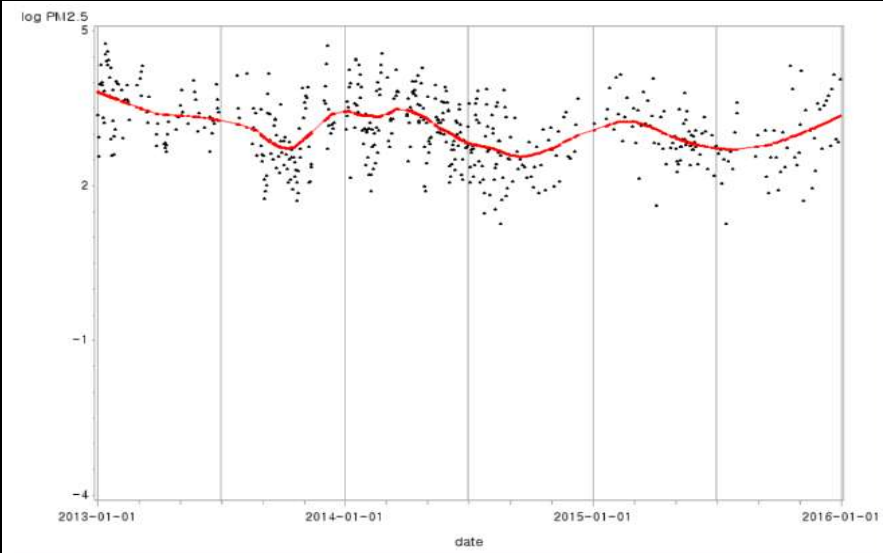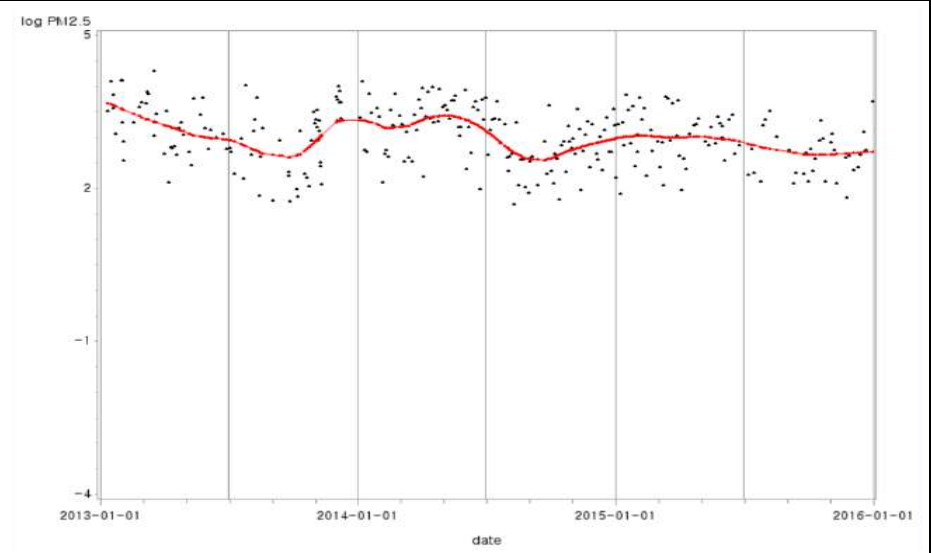

B. EC

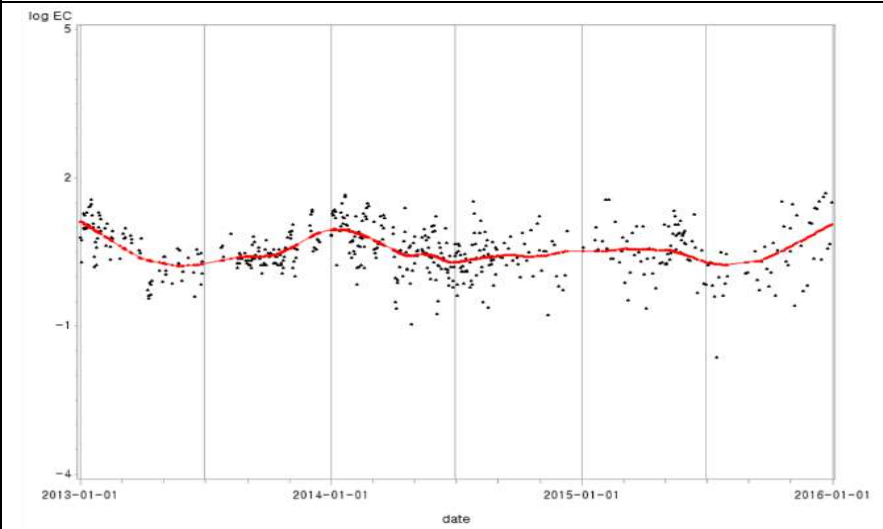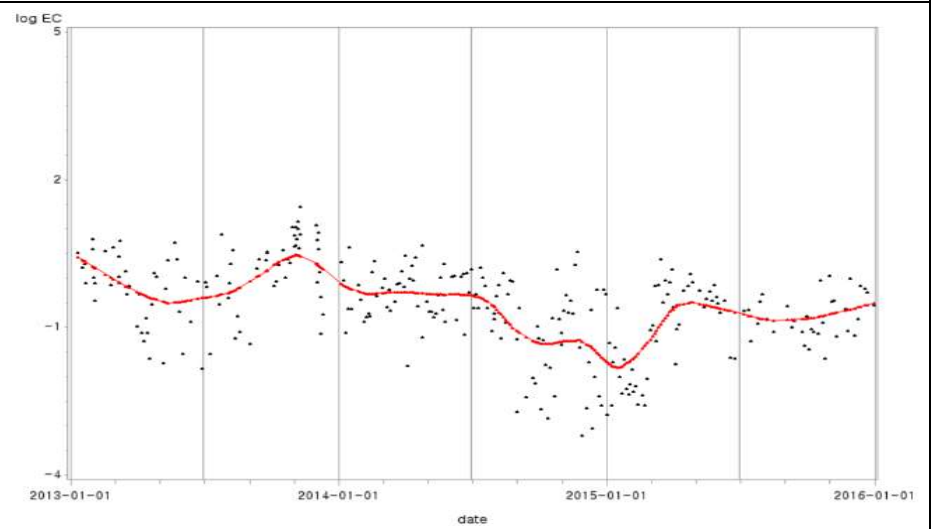

C. Ni

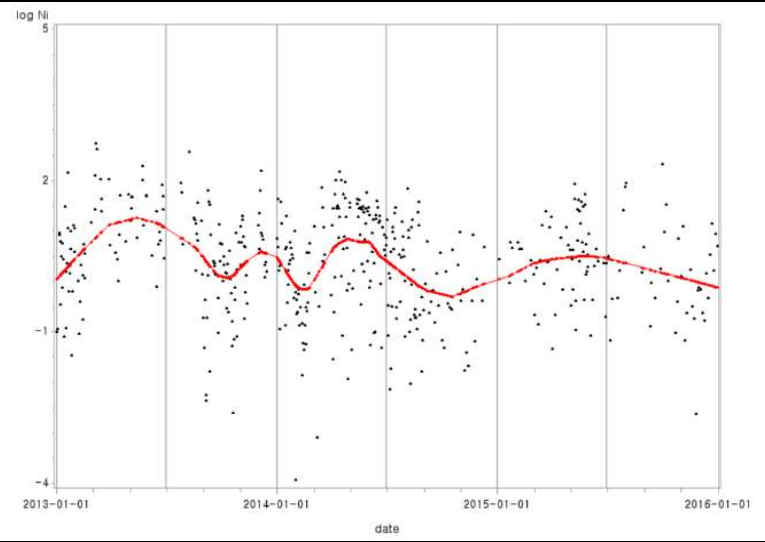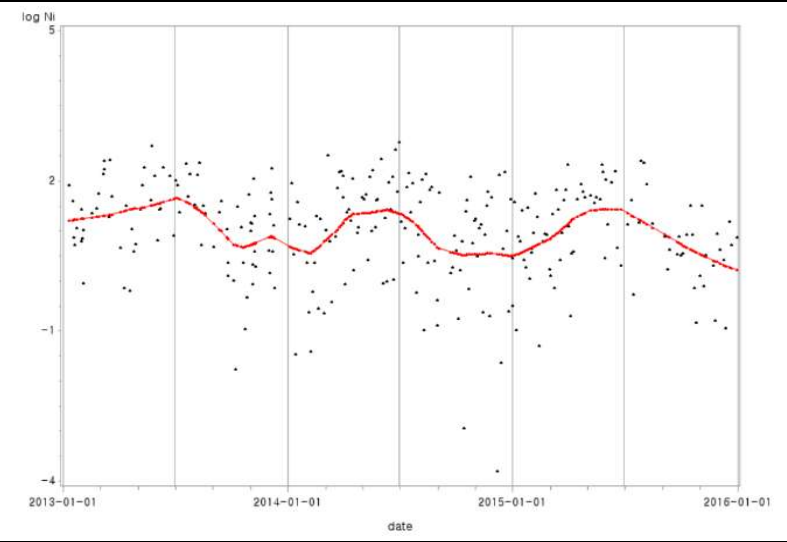

D. OC

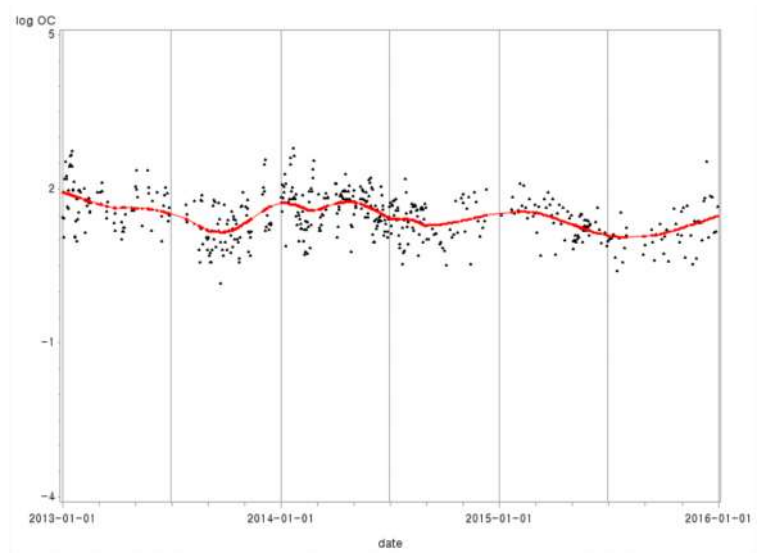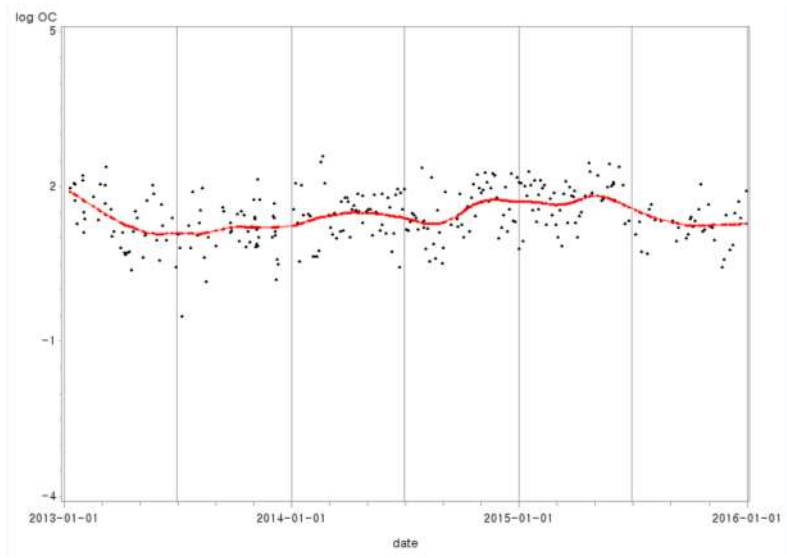

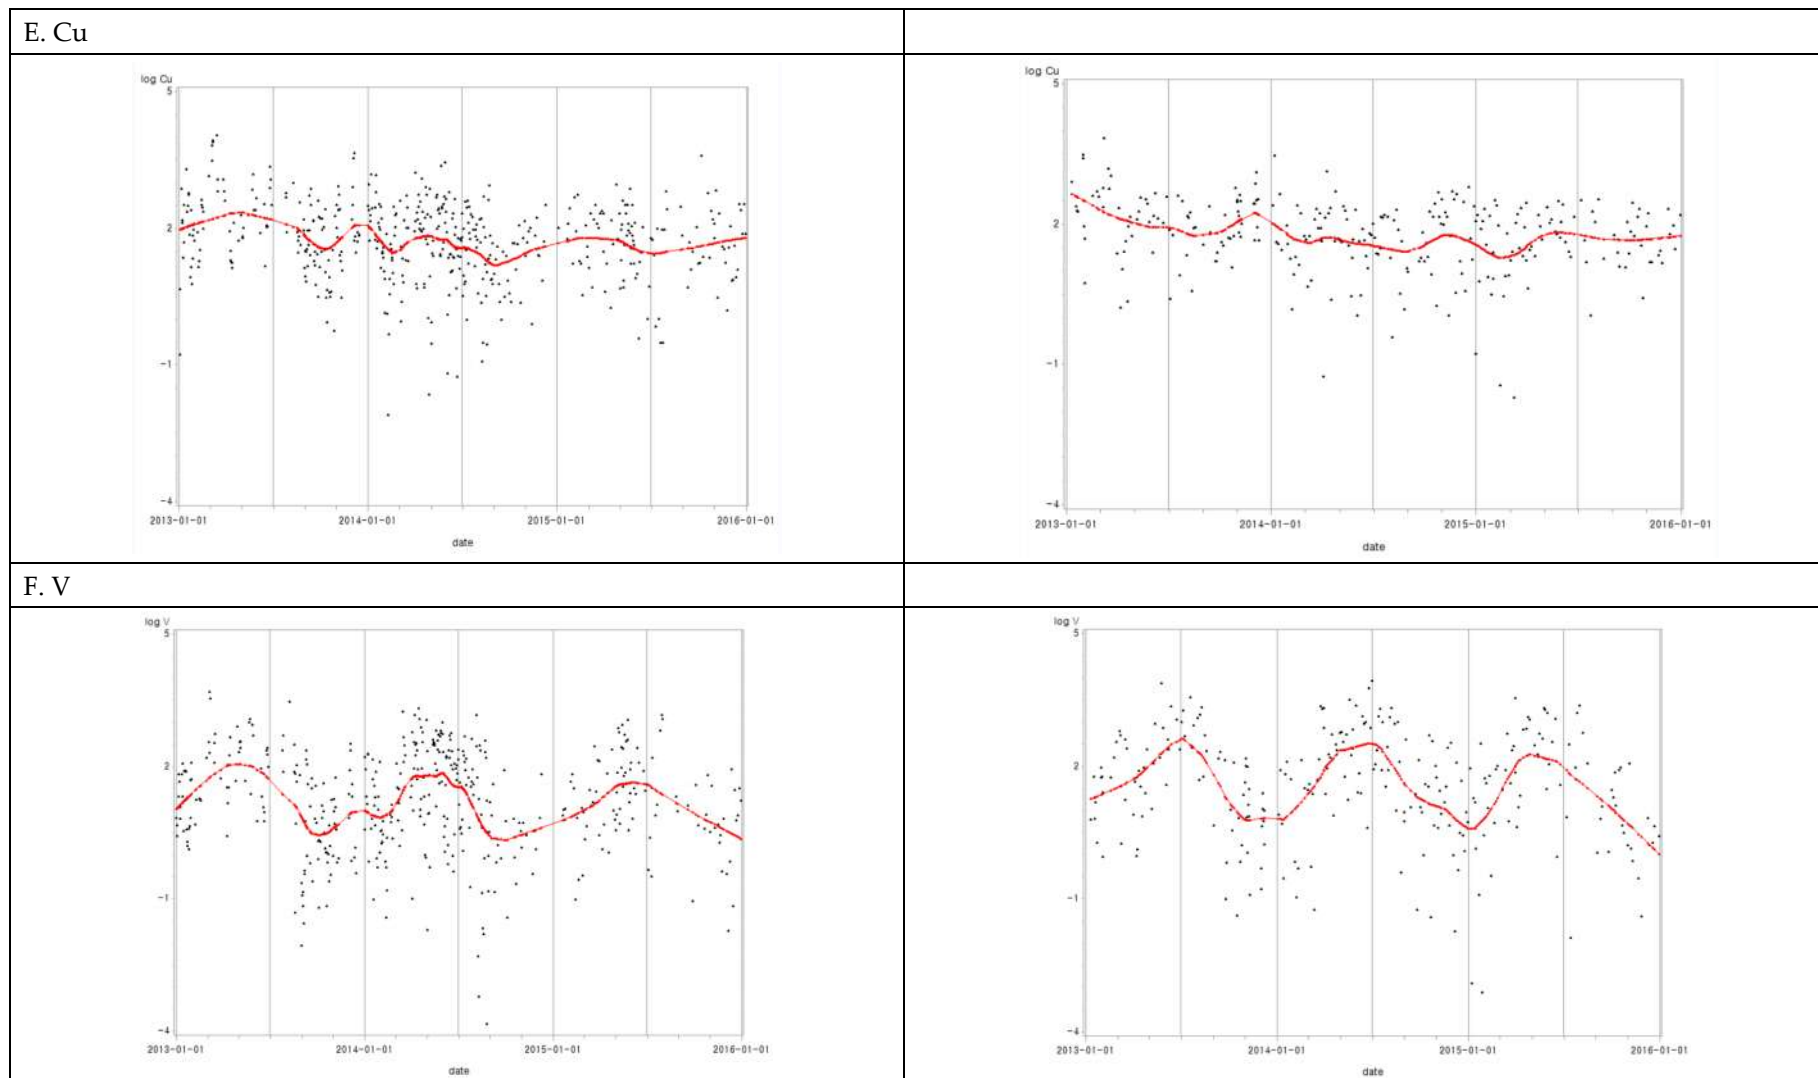

**Figure S1.** Time-series plots of daily log-transformed concentrations of PM<sub>2.5</sub>, elemental carbon (EC), nickel (Ni), organic carbon (OC), copper (Cu), and vanadium (V), in the two largest South Korean cities (left: Seoul, right: Busan) from 2013 to 2015 (red lines for smoothed lines based on locally weighted scatterplot smoothing).

### A. Non-accidental mortality

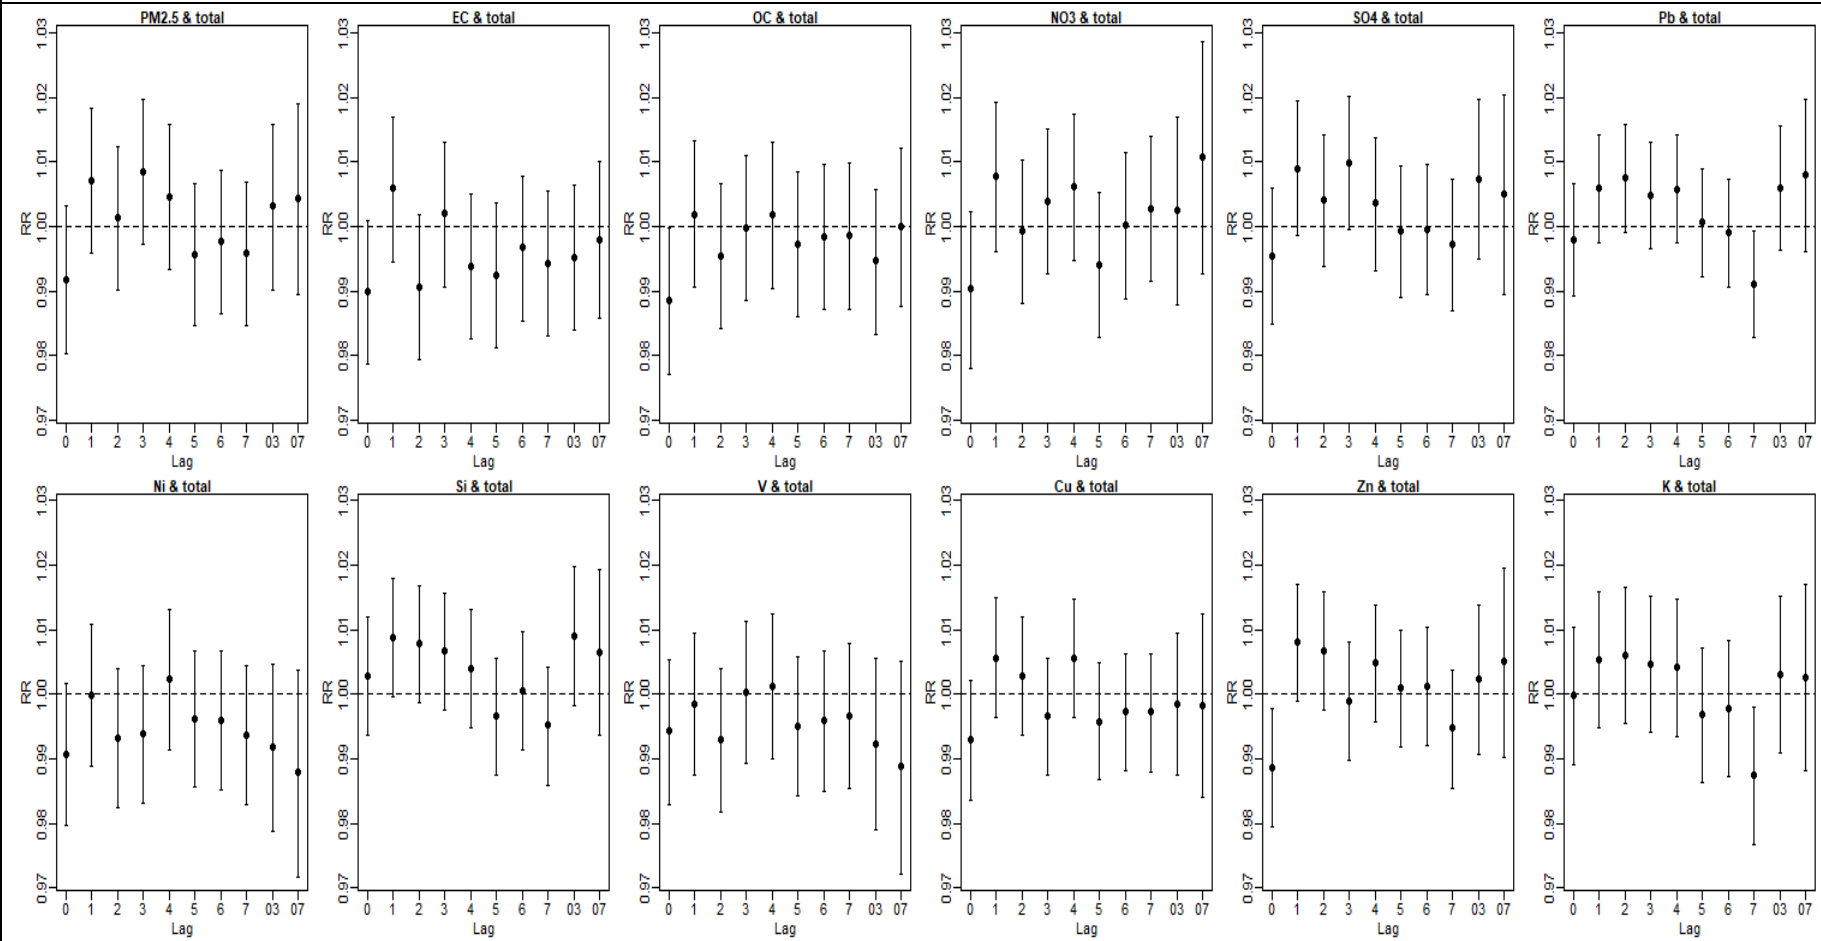

Seoul

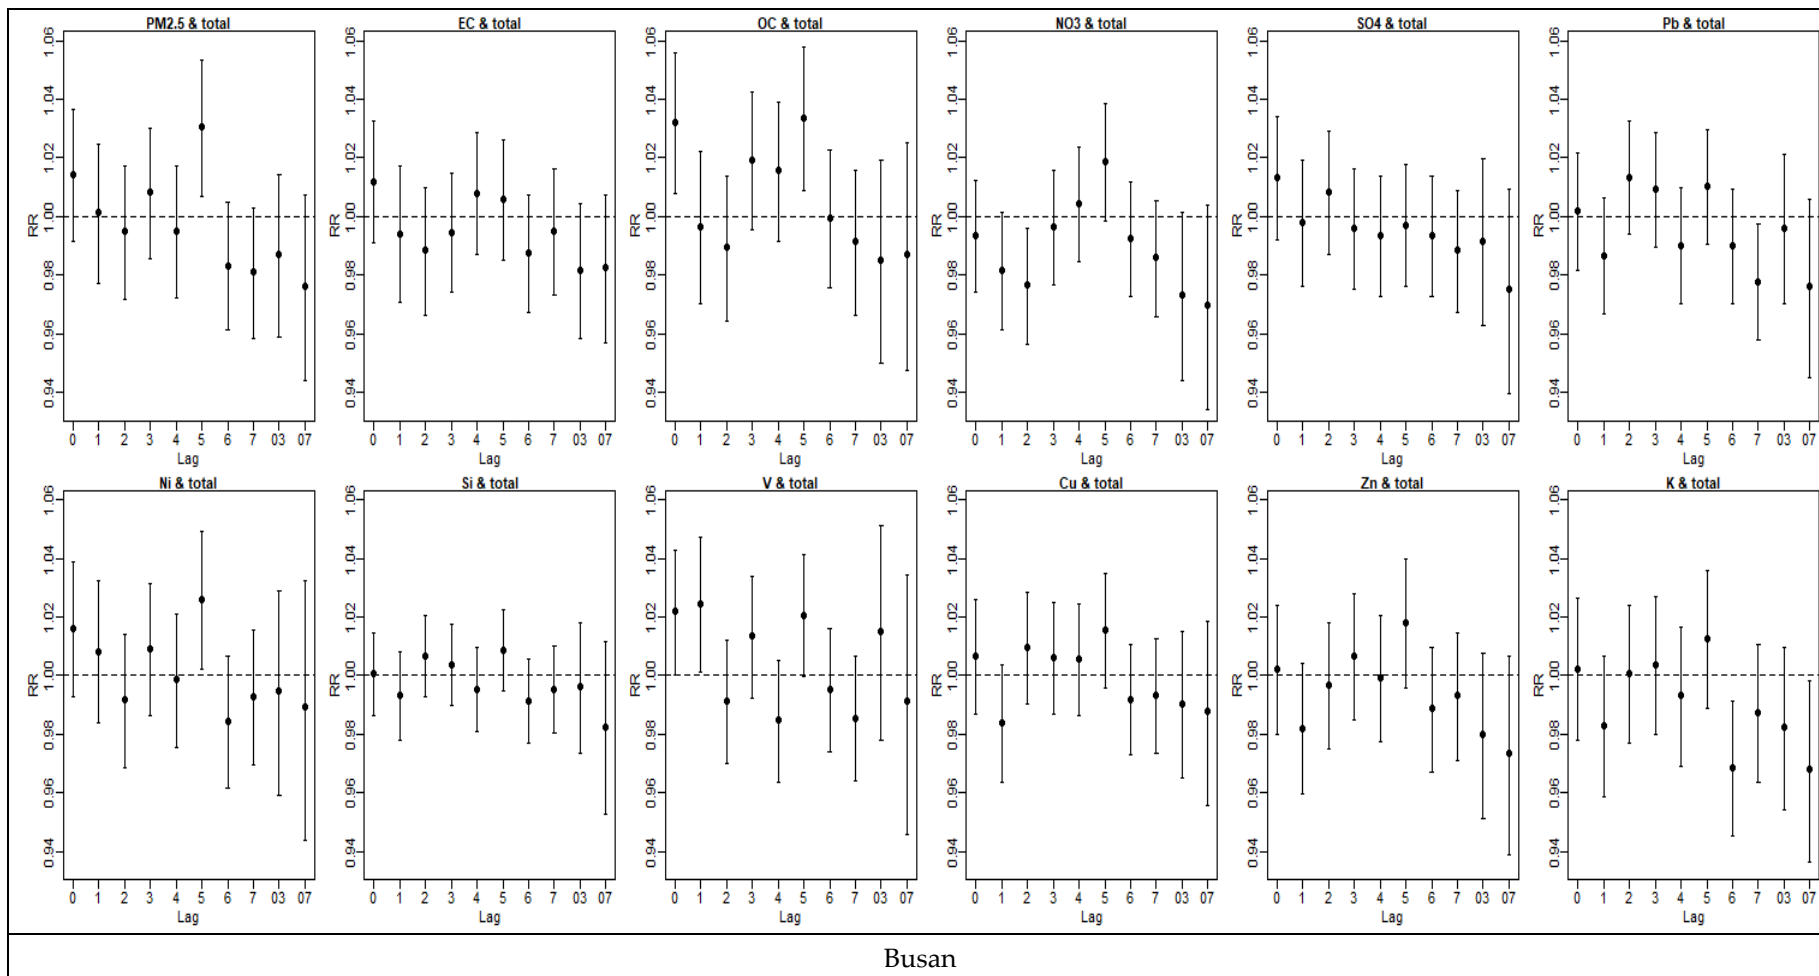

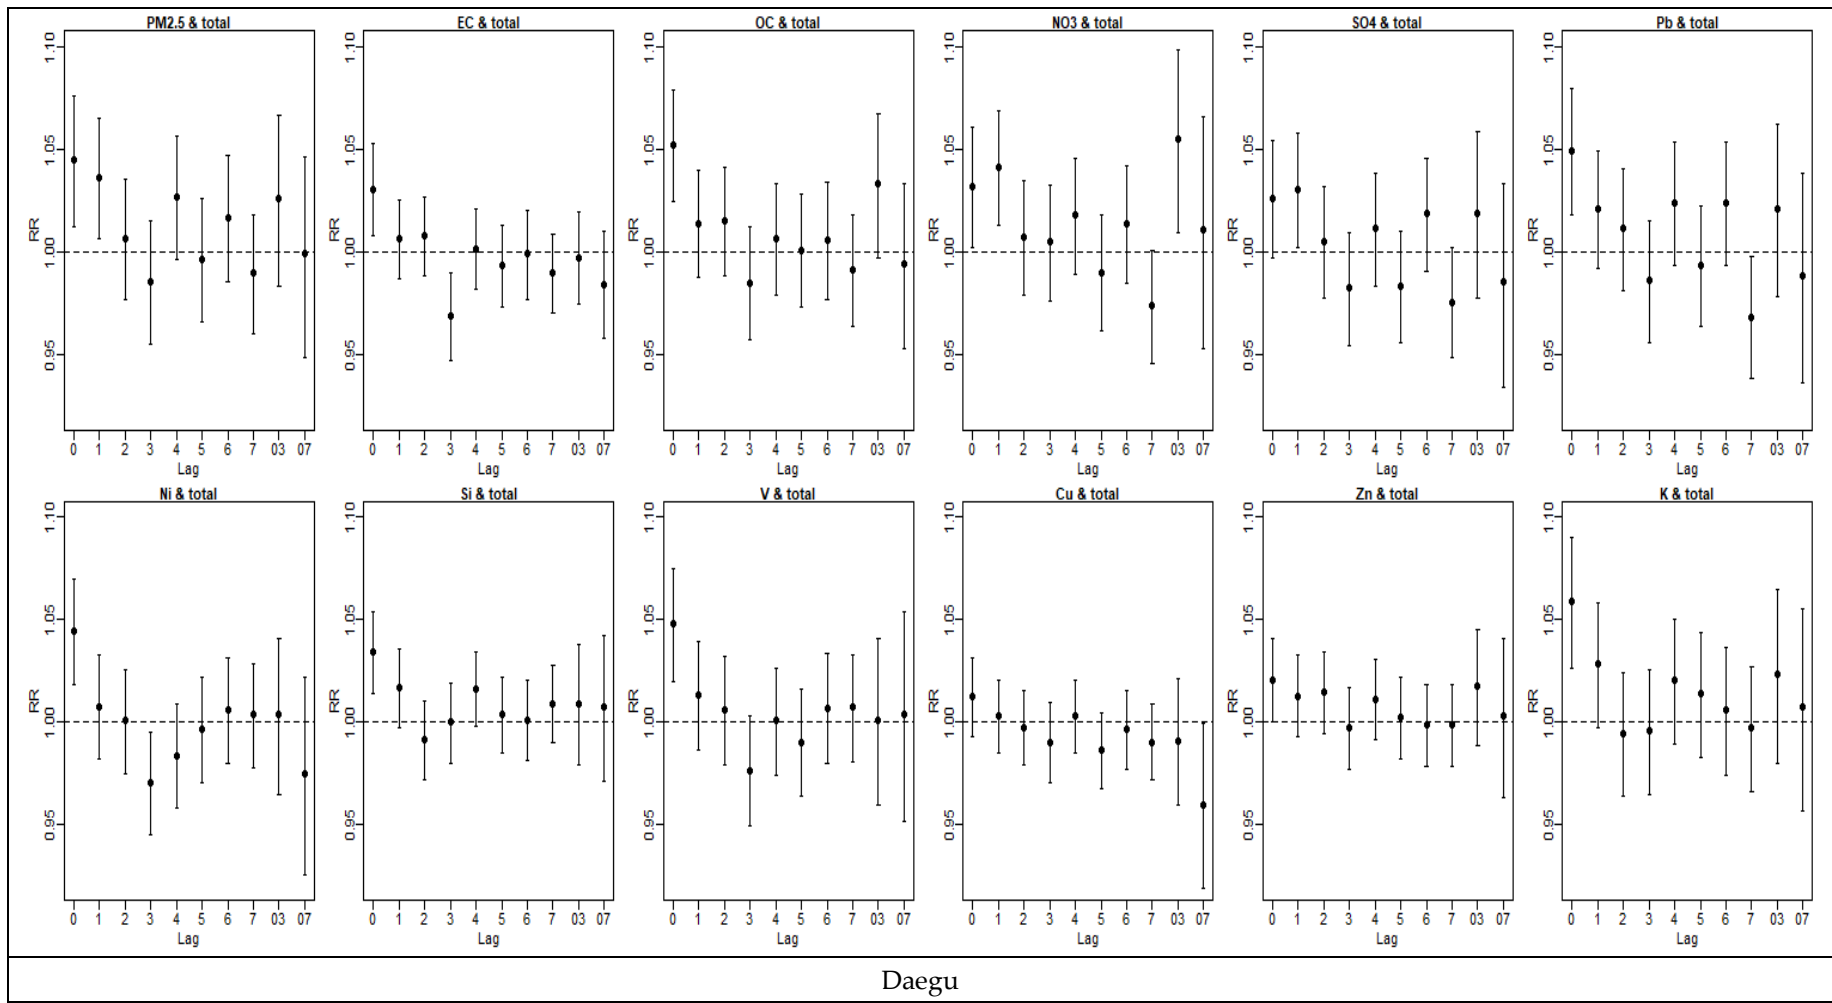

Daegu

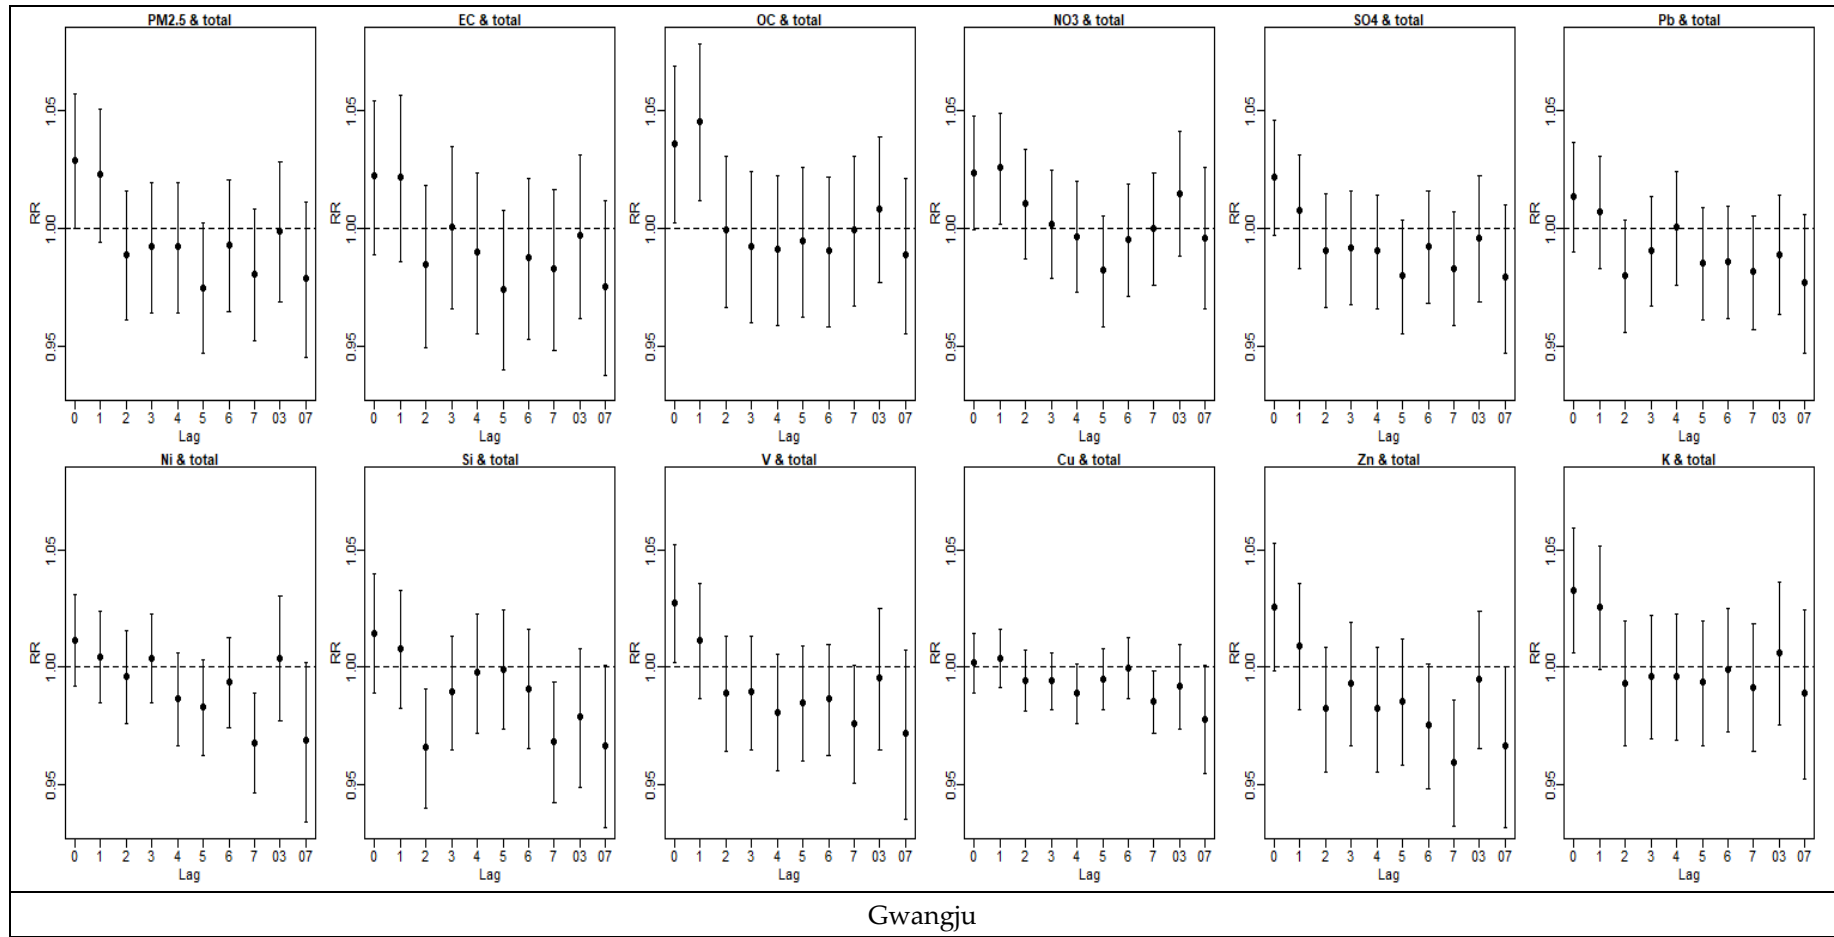



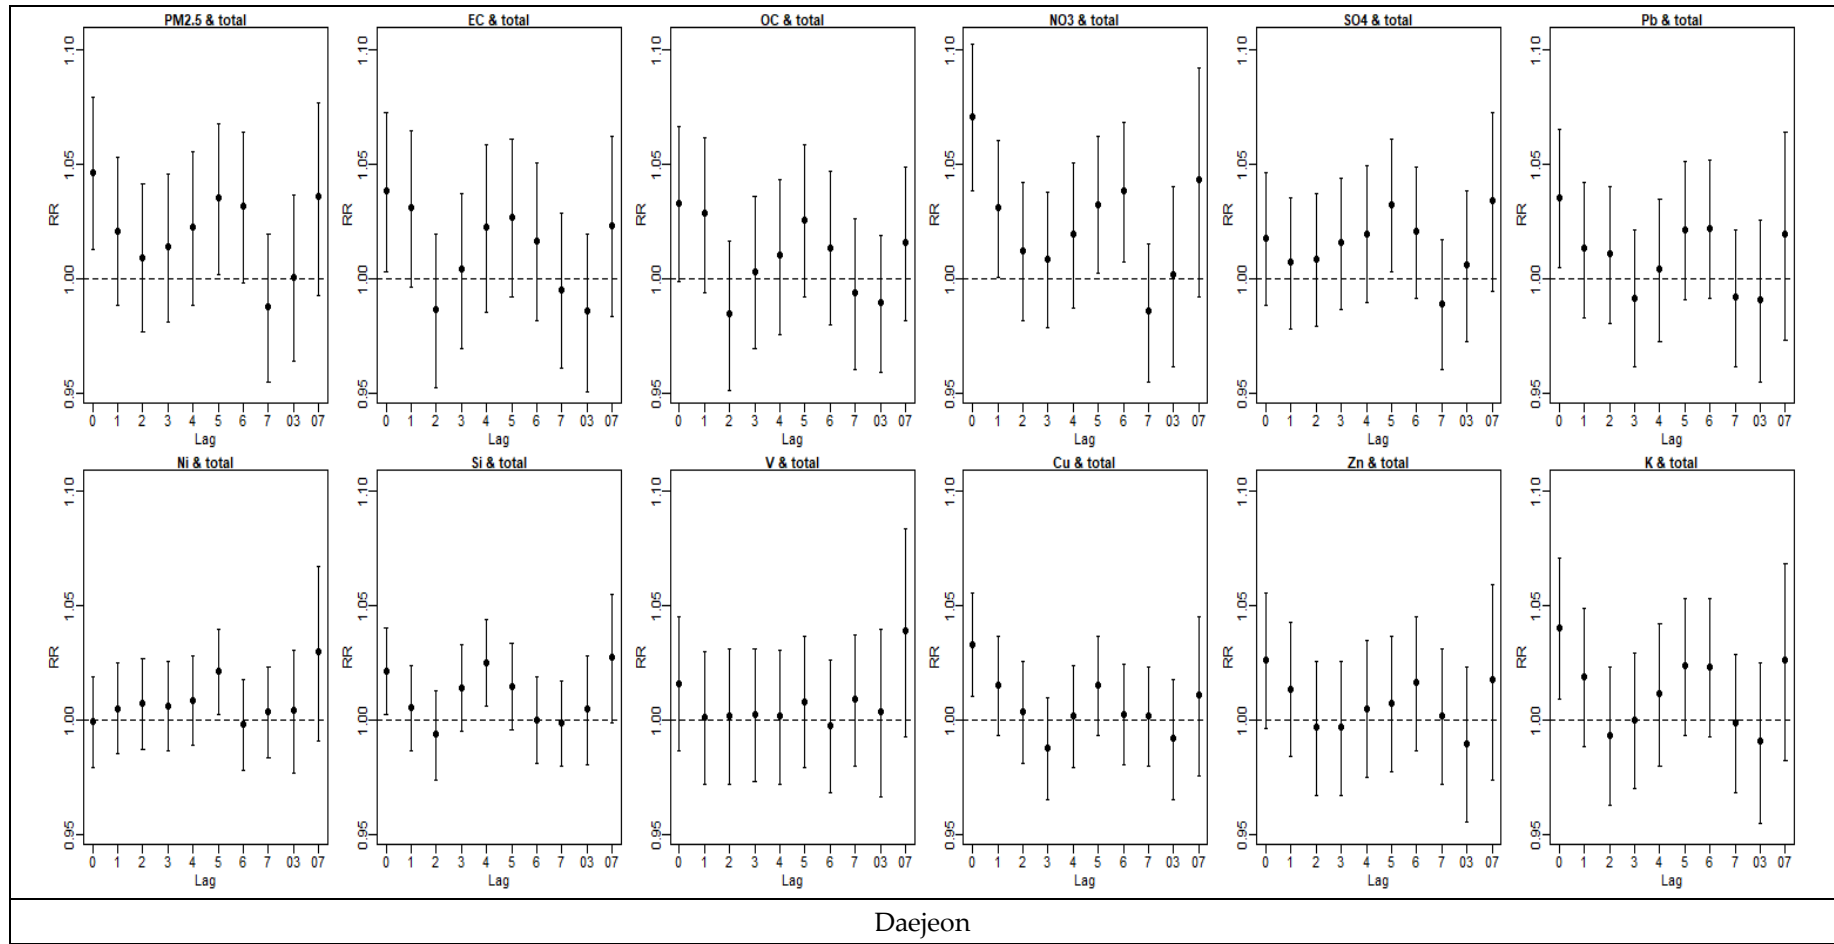

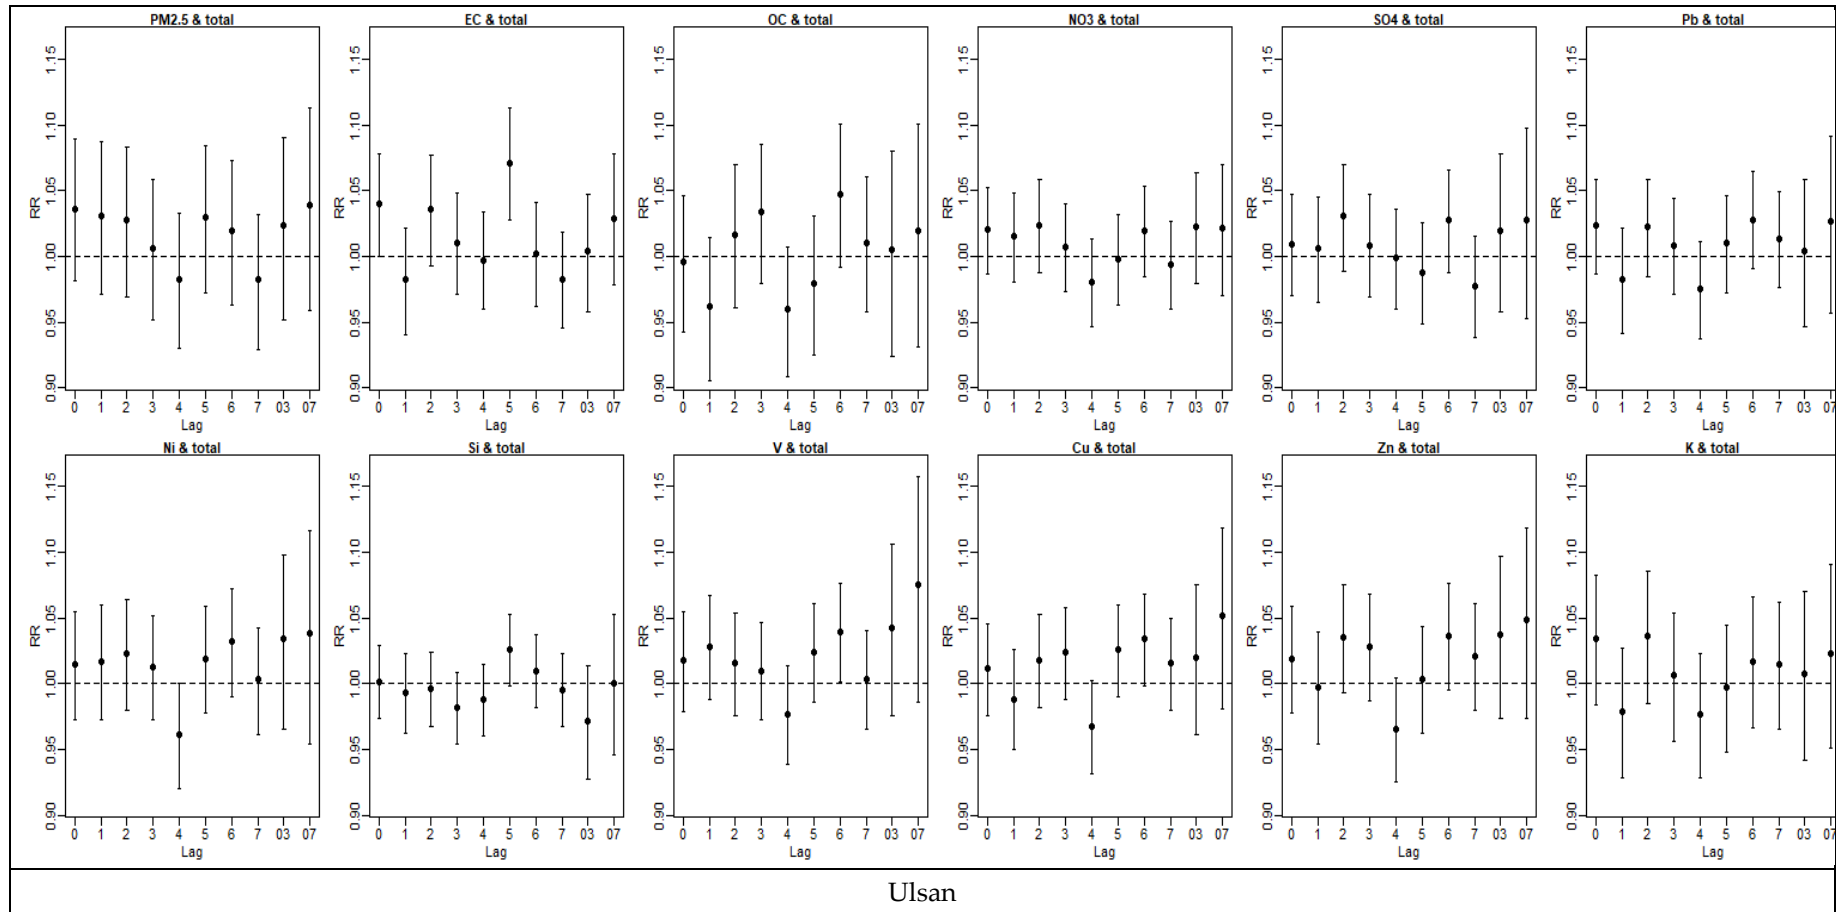

## B. Cardiovascular mortality

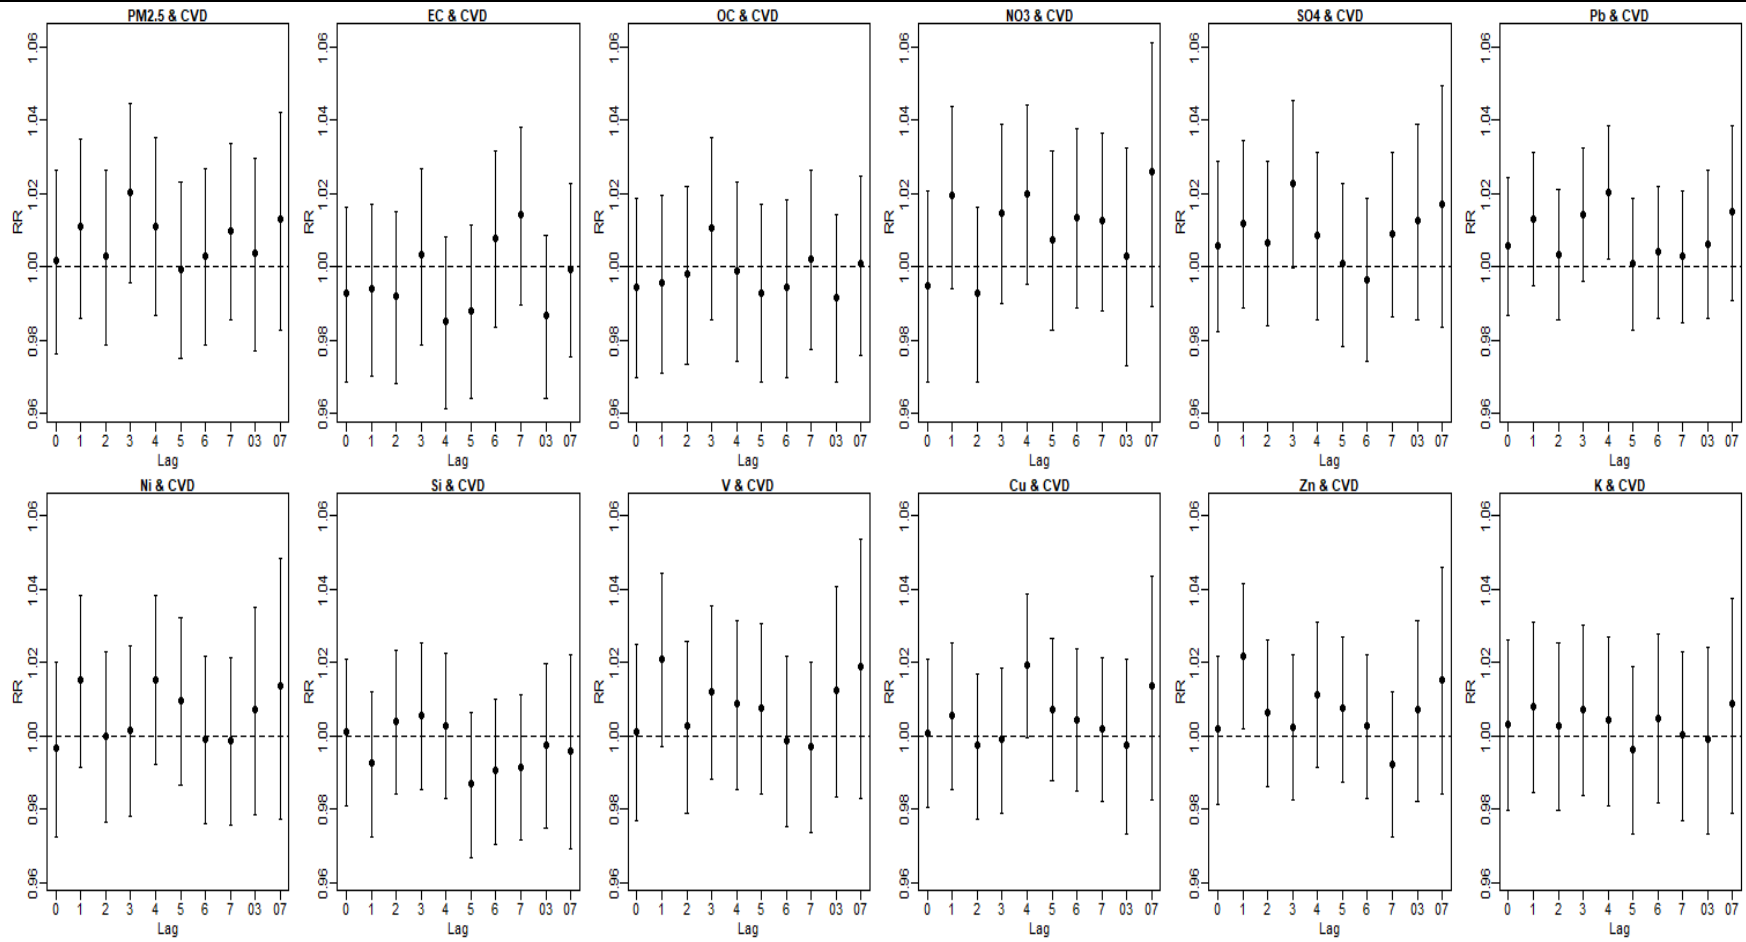

Seoul

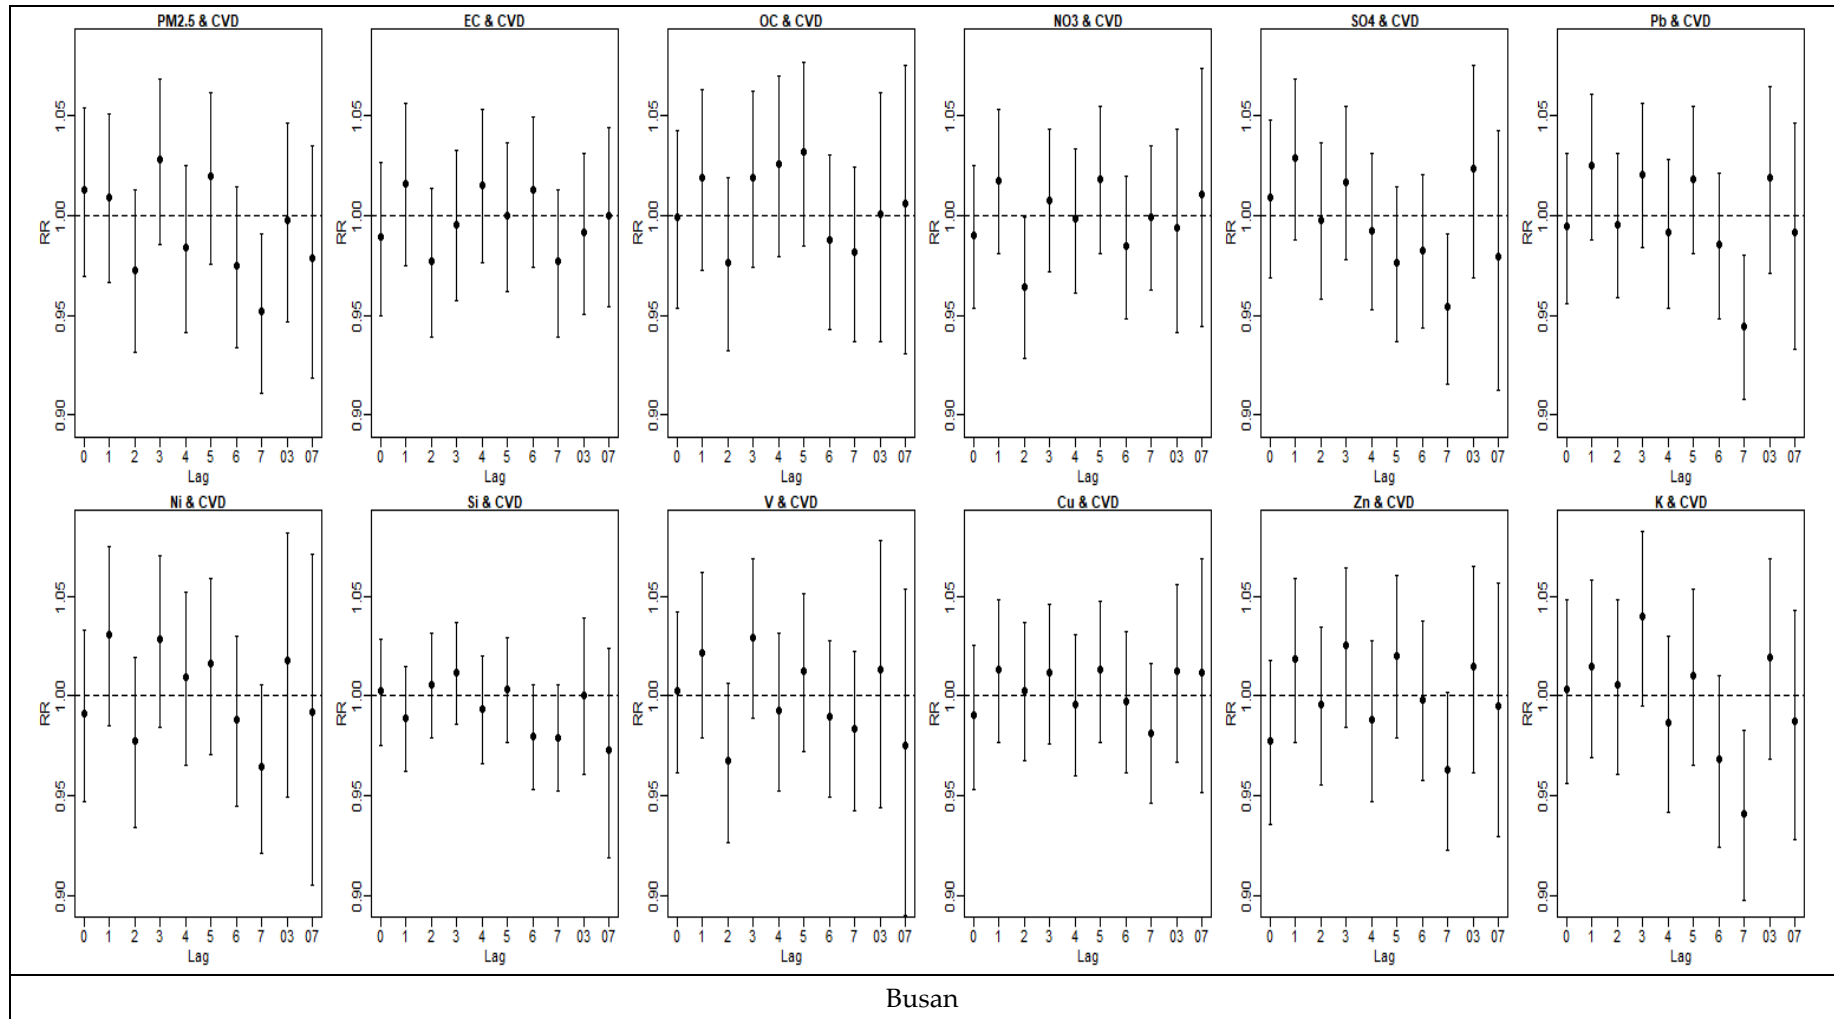

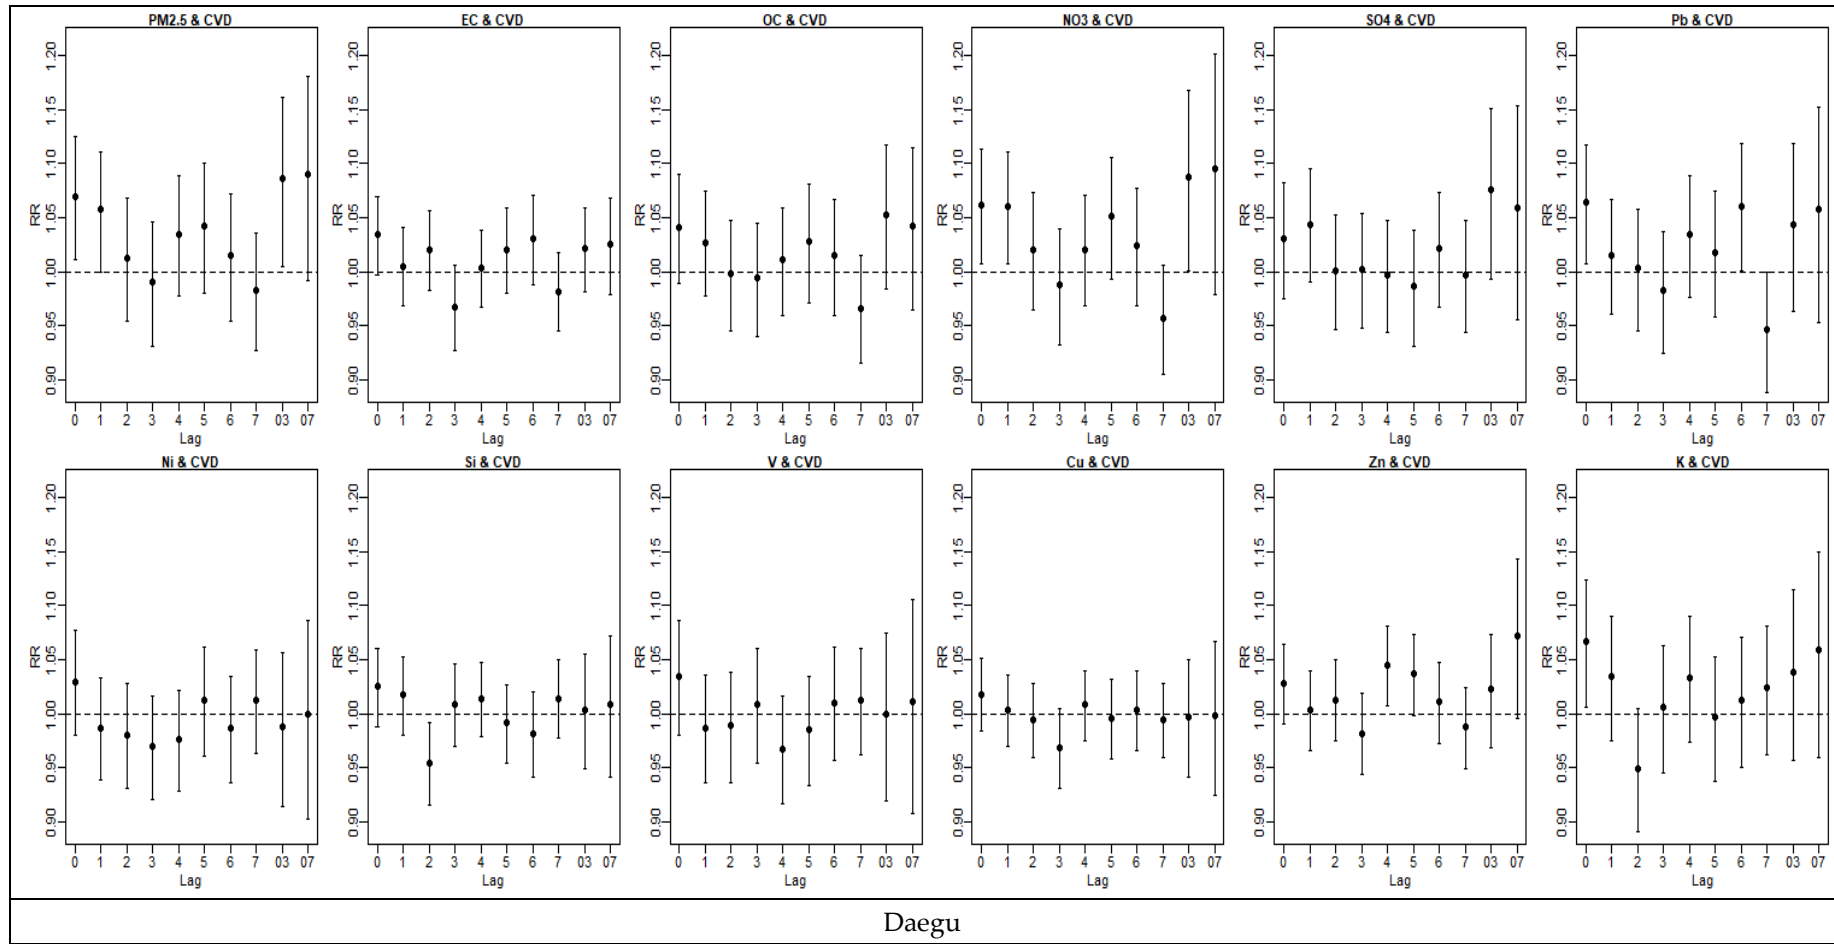

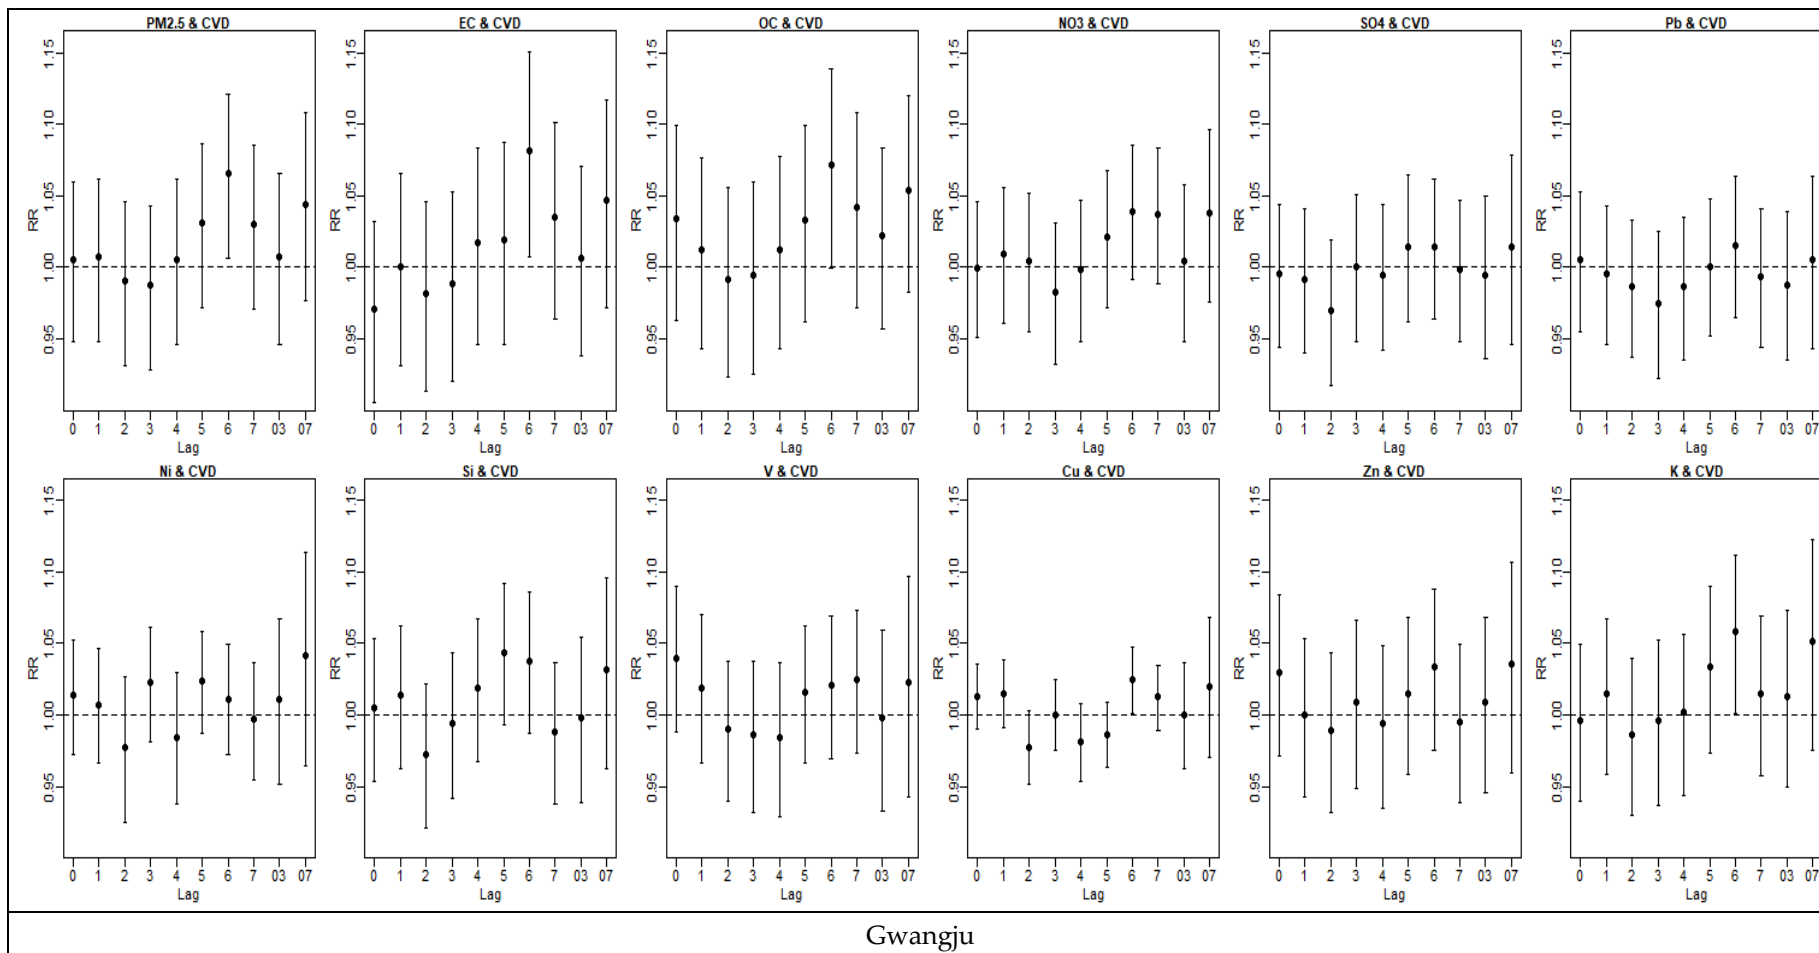

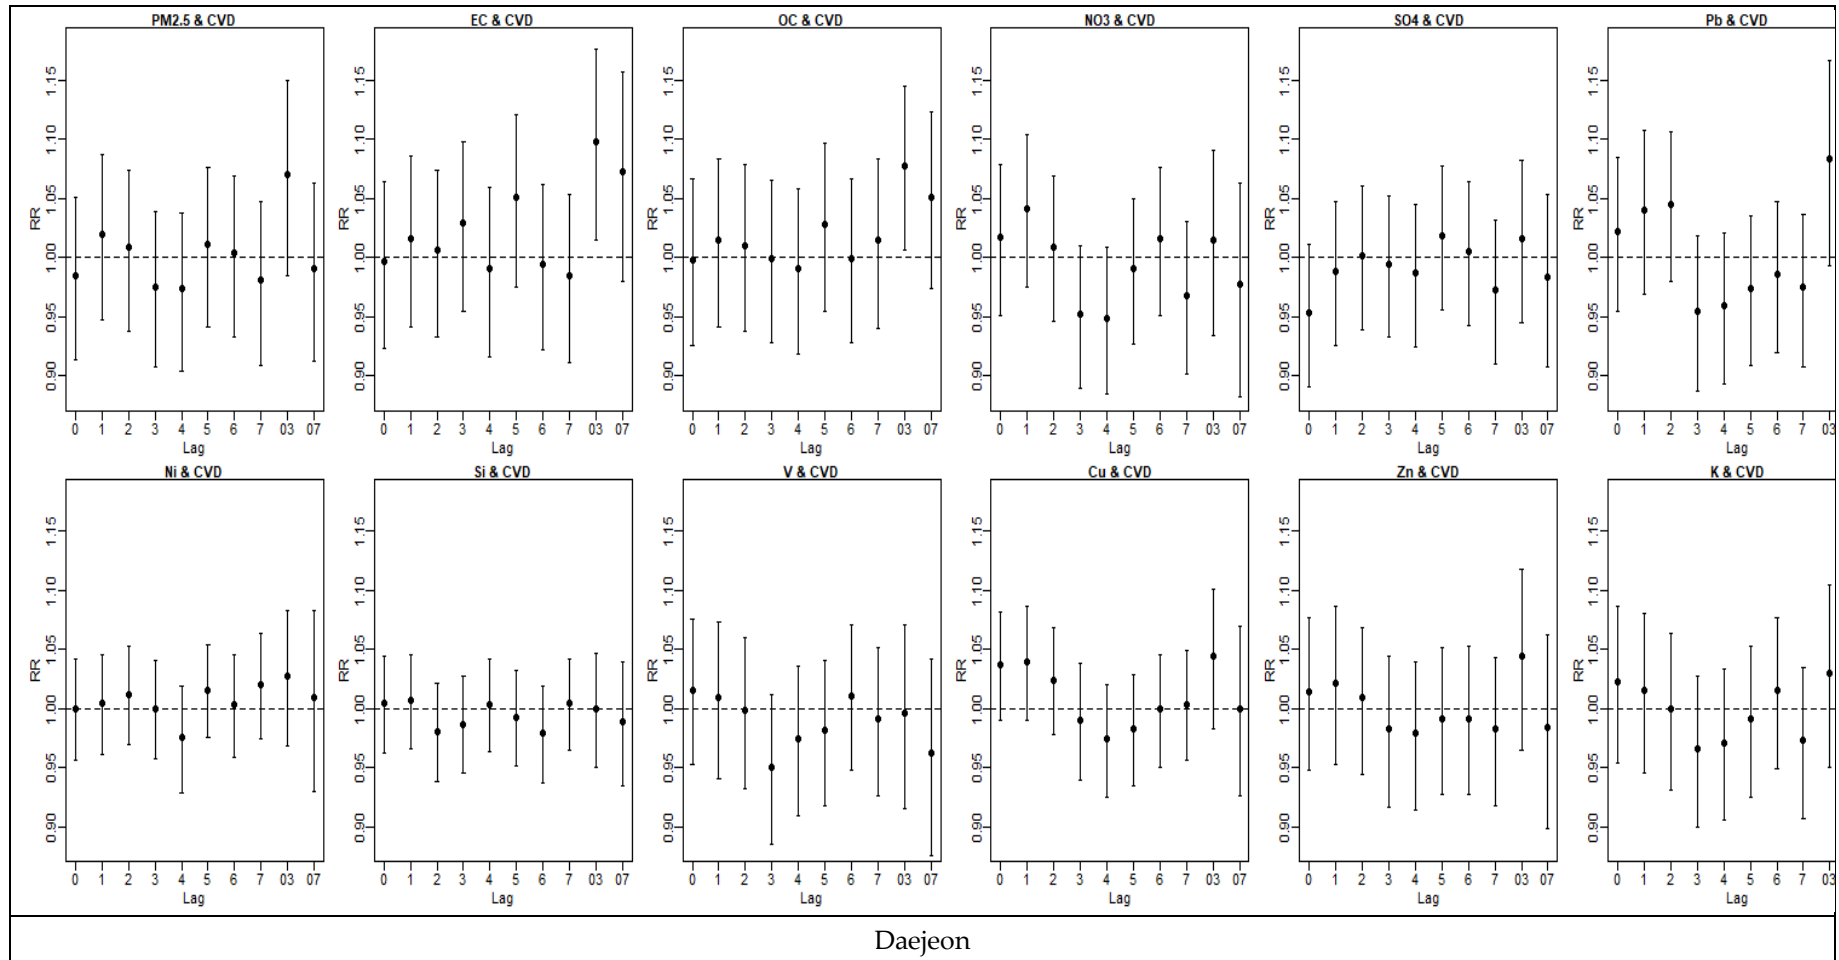

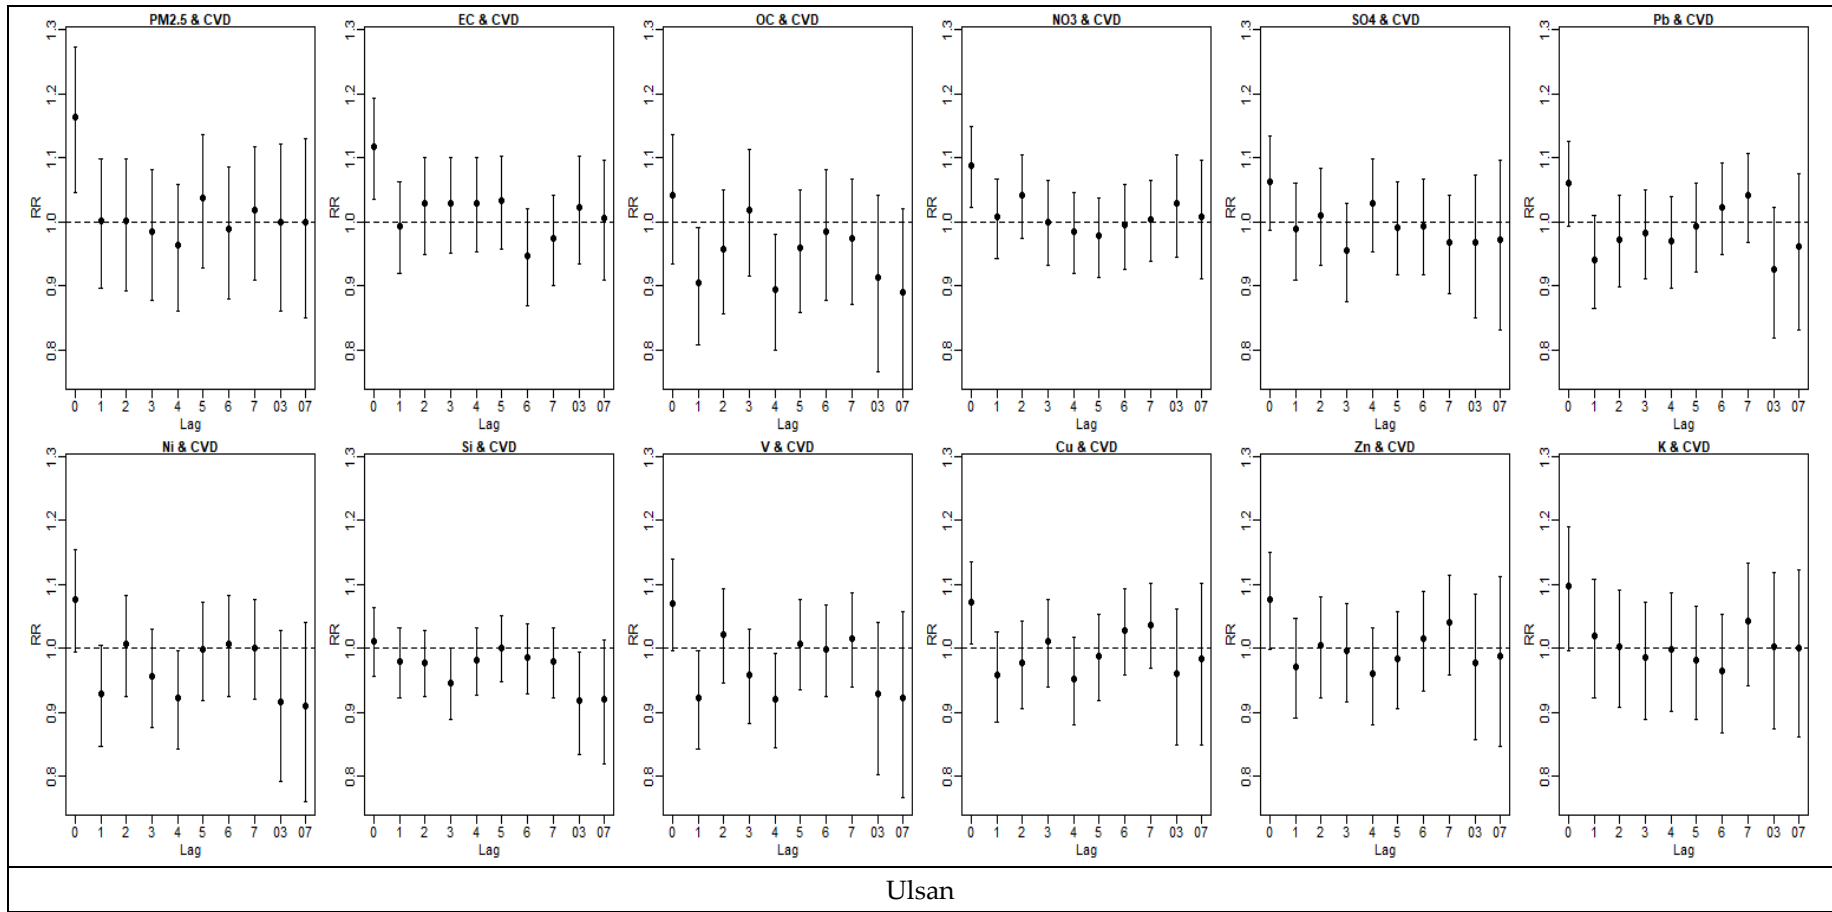

Ulsan



### C. Respiratory mortality

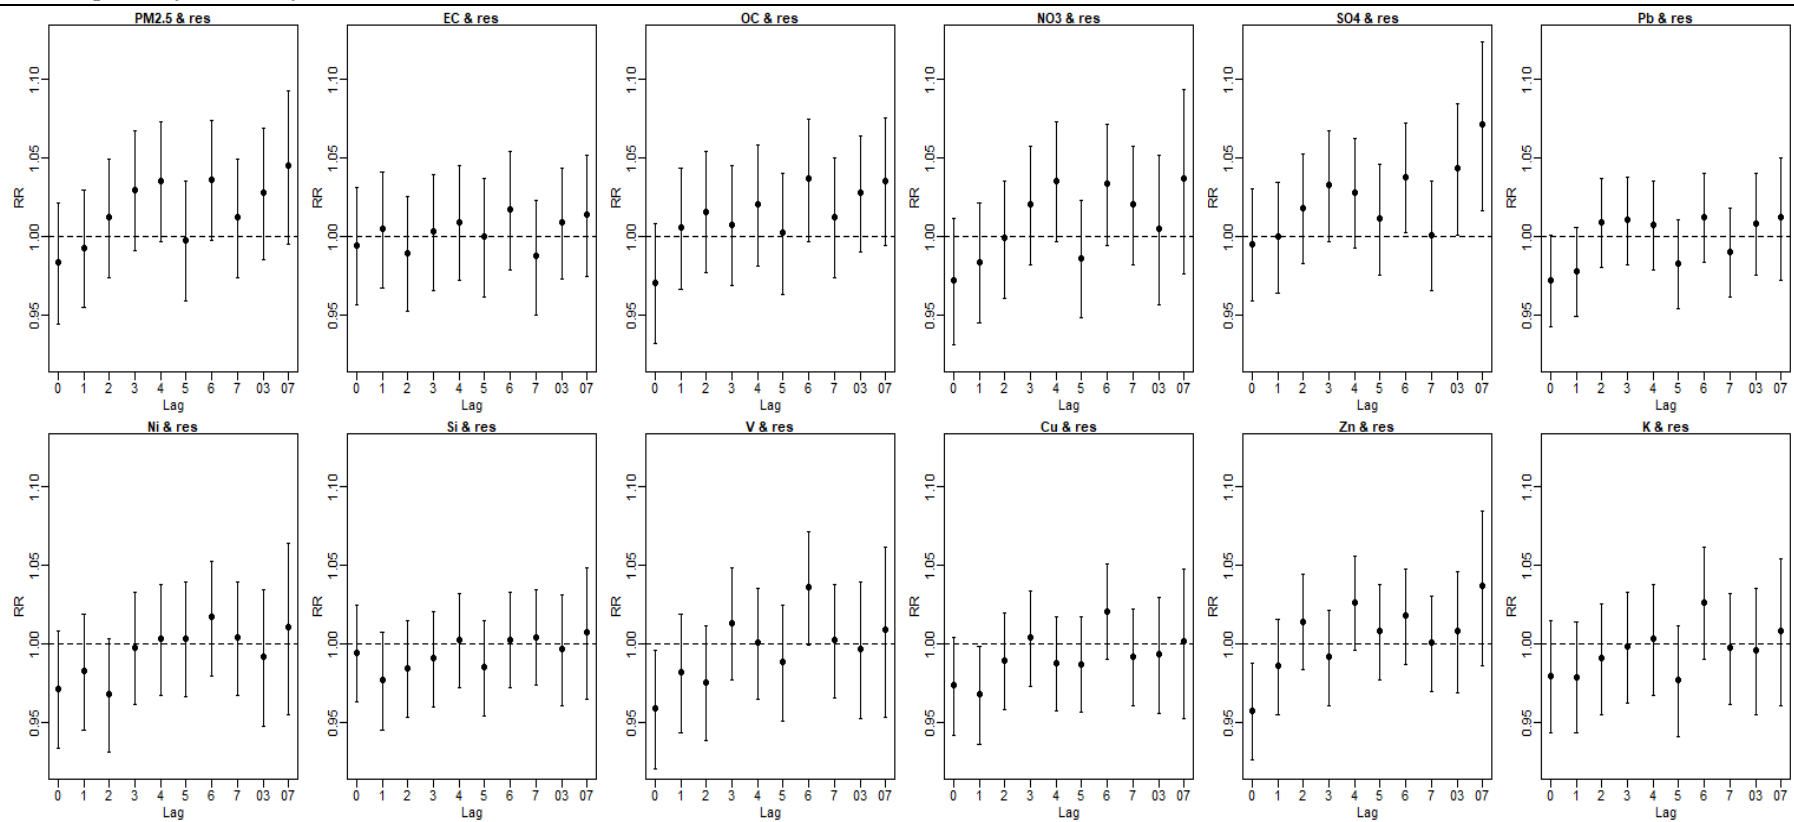

Seoul

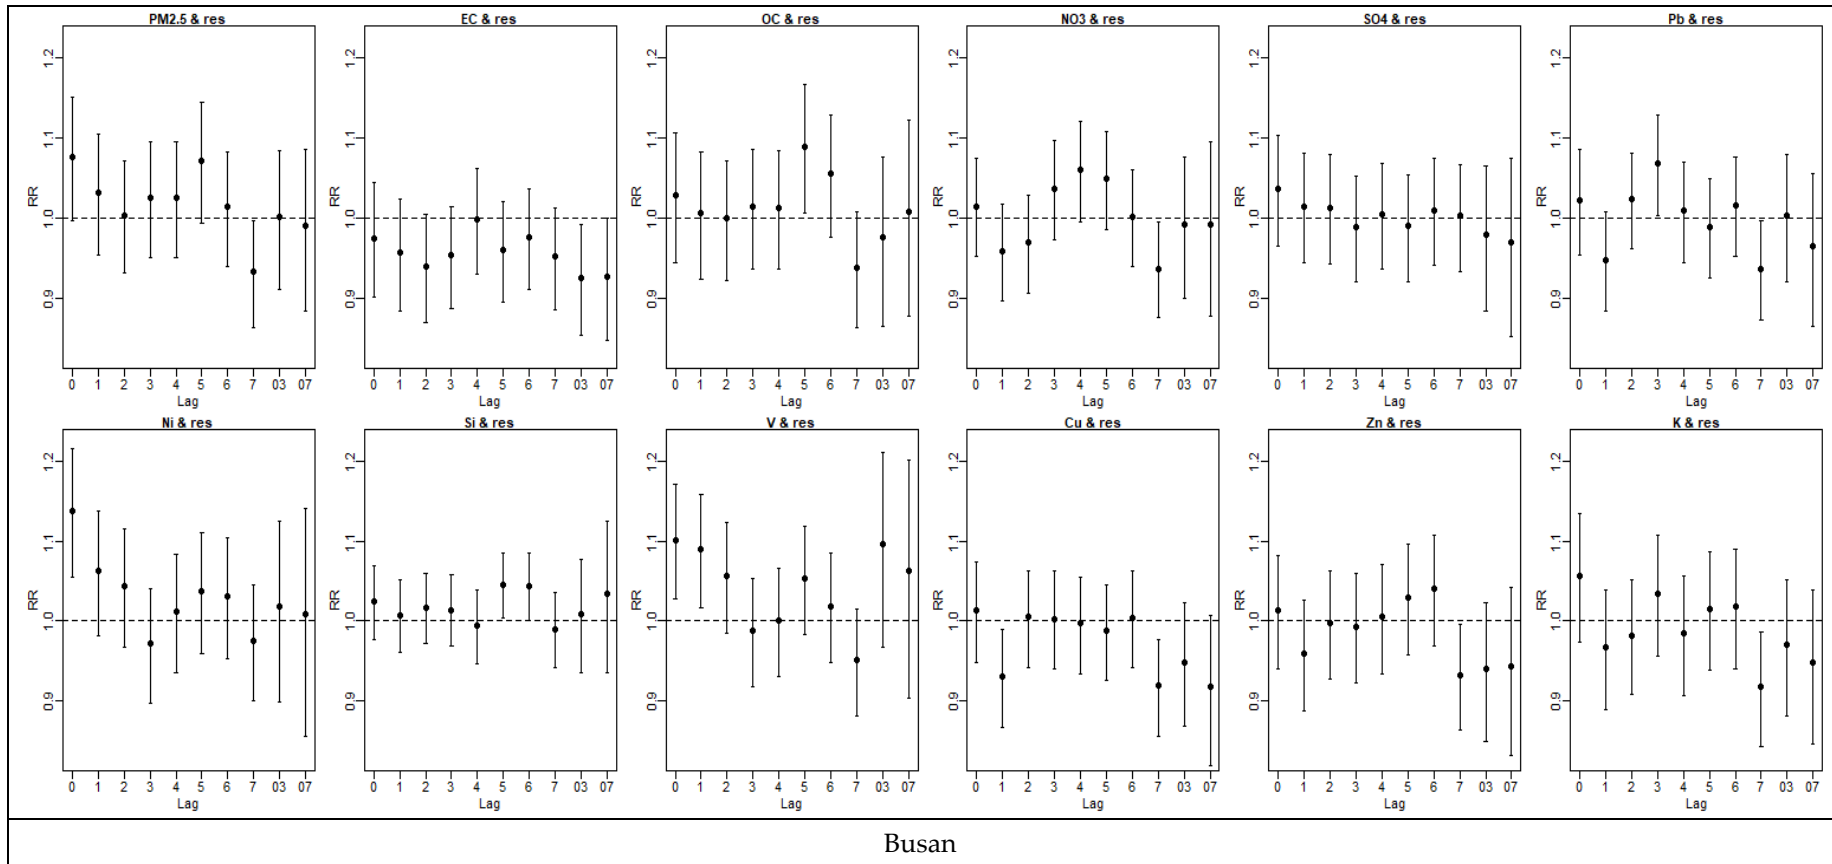

**PM2.5 & res**

**EC & res**

**OC & res**

**NO3 & res**

**SO4 & res**

**Pb & res**

**Ni & res**

**Si & res**

**V & res**

**Cu & res**

**Zn & res**

**K & res**

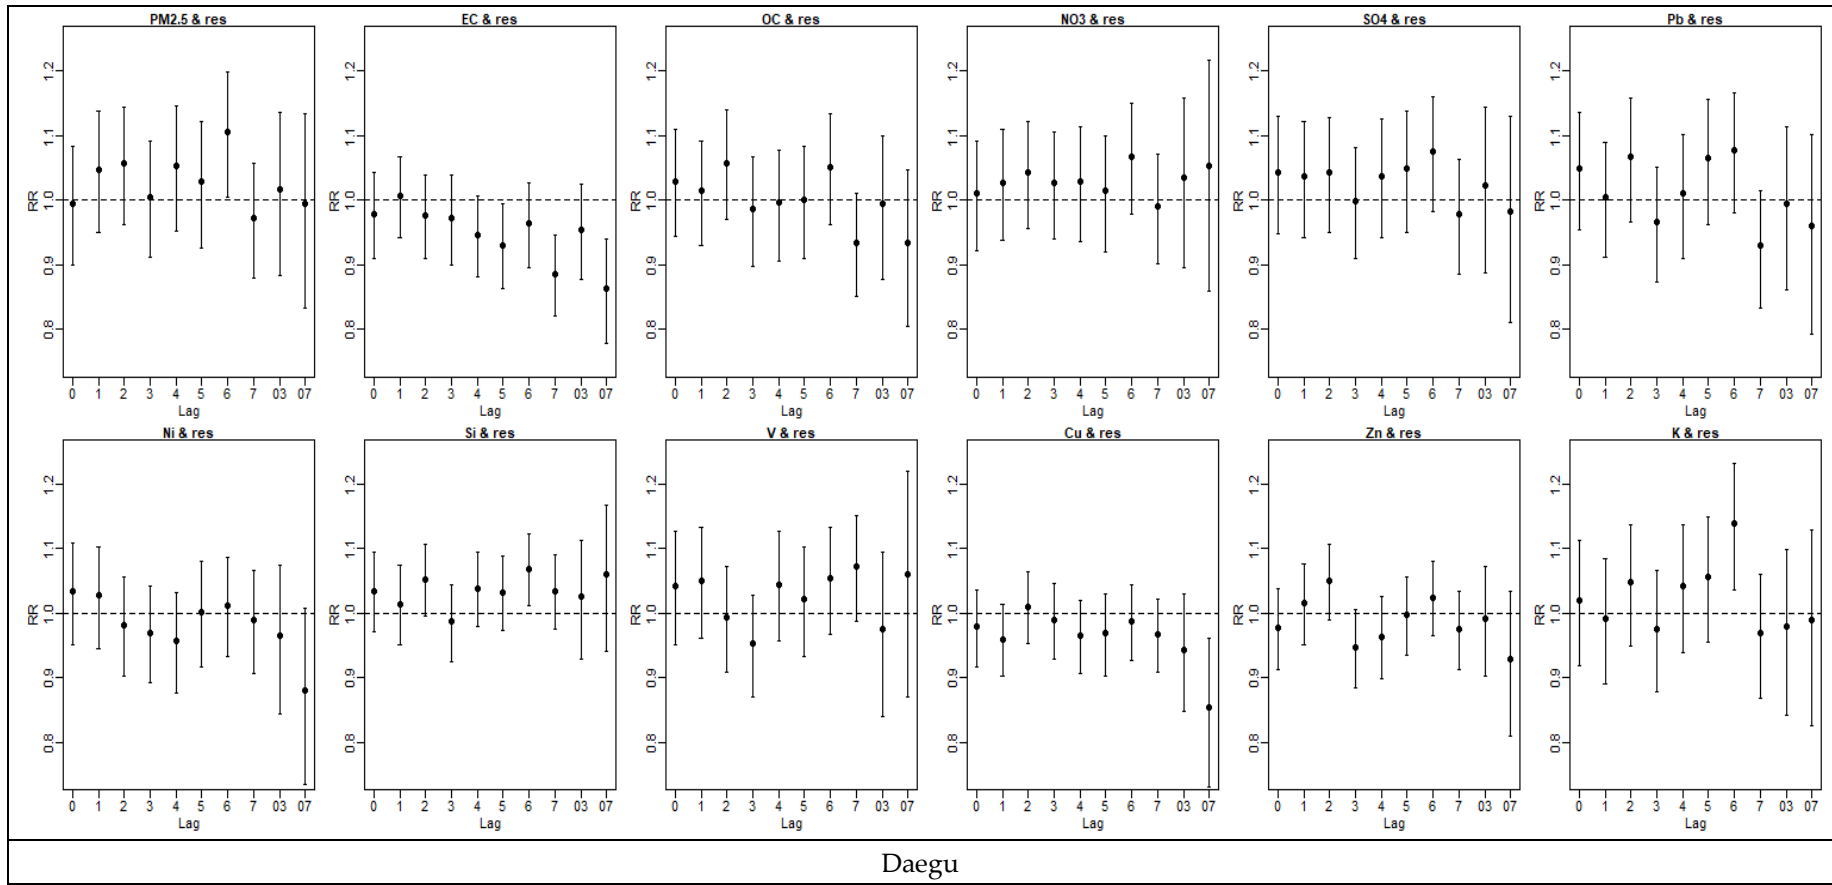

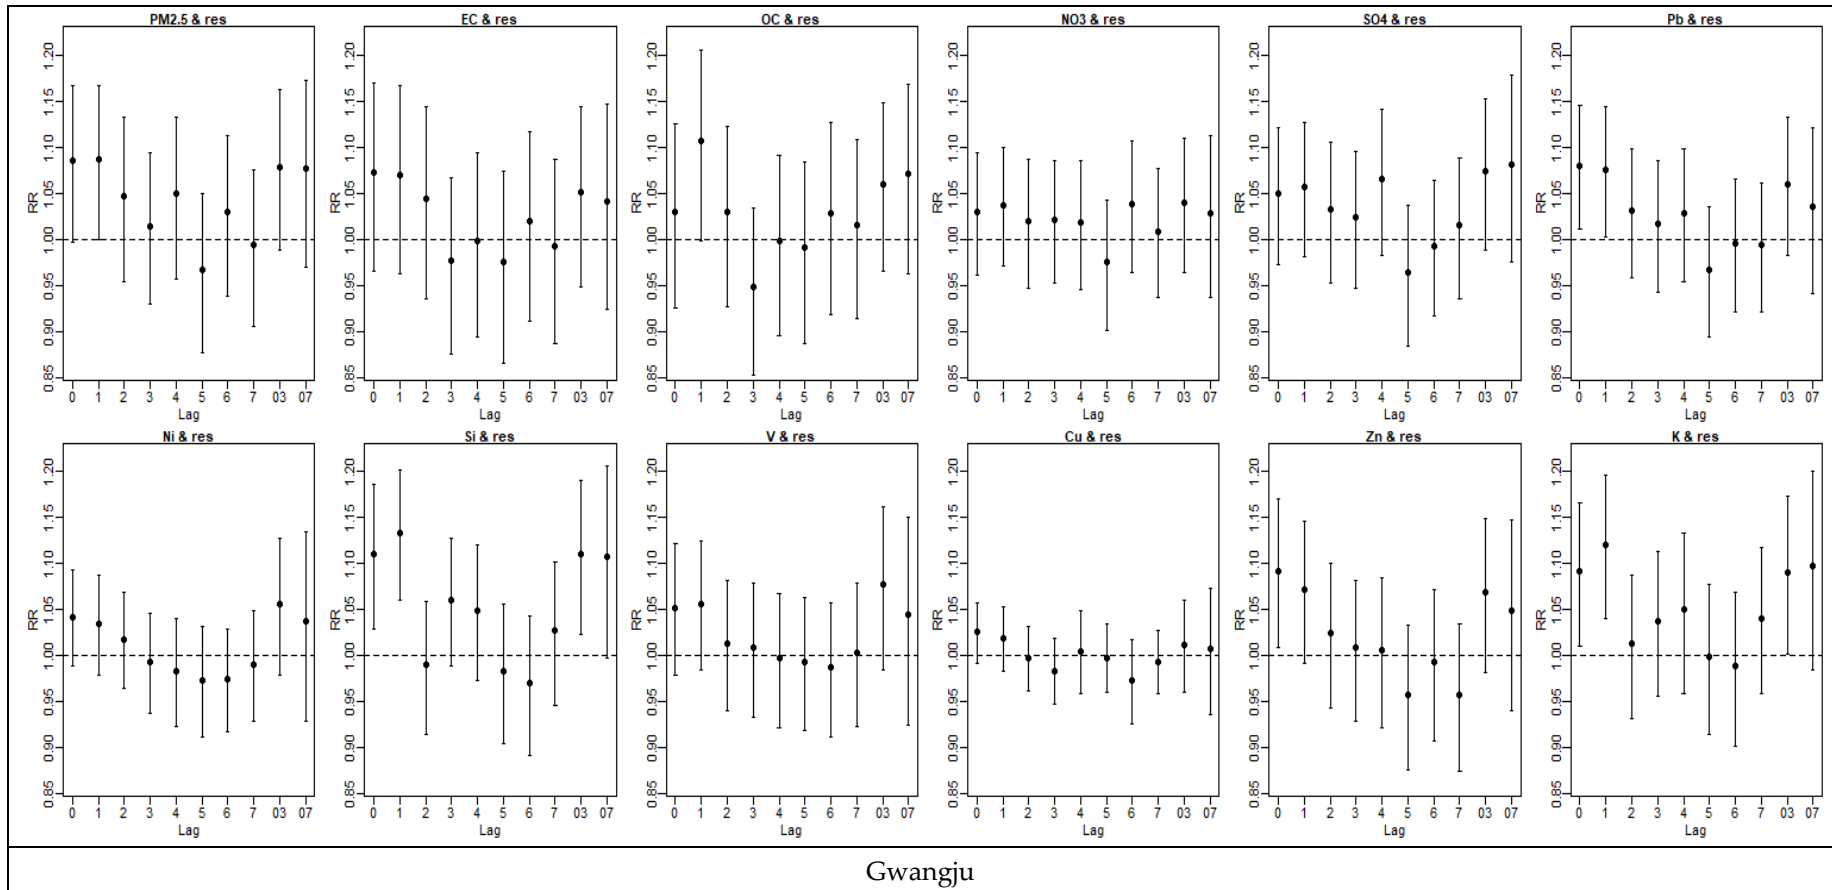

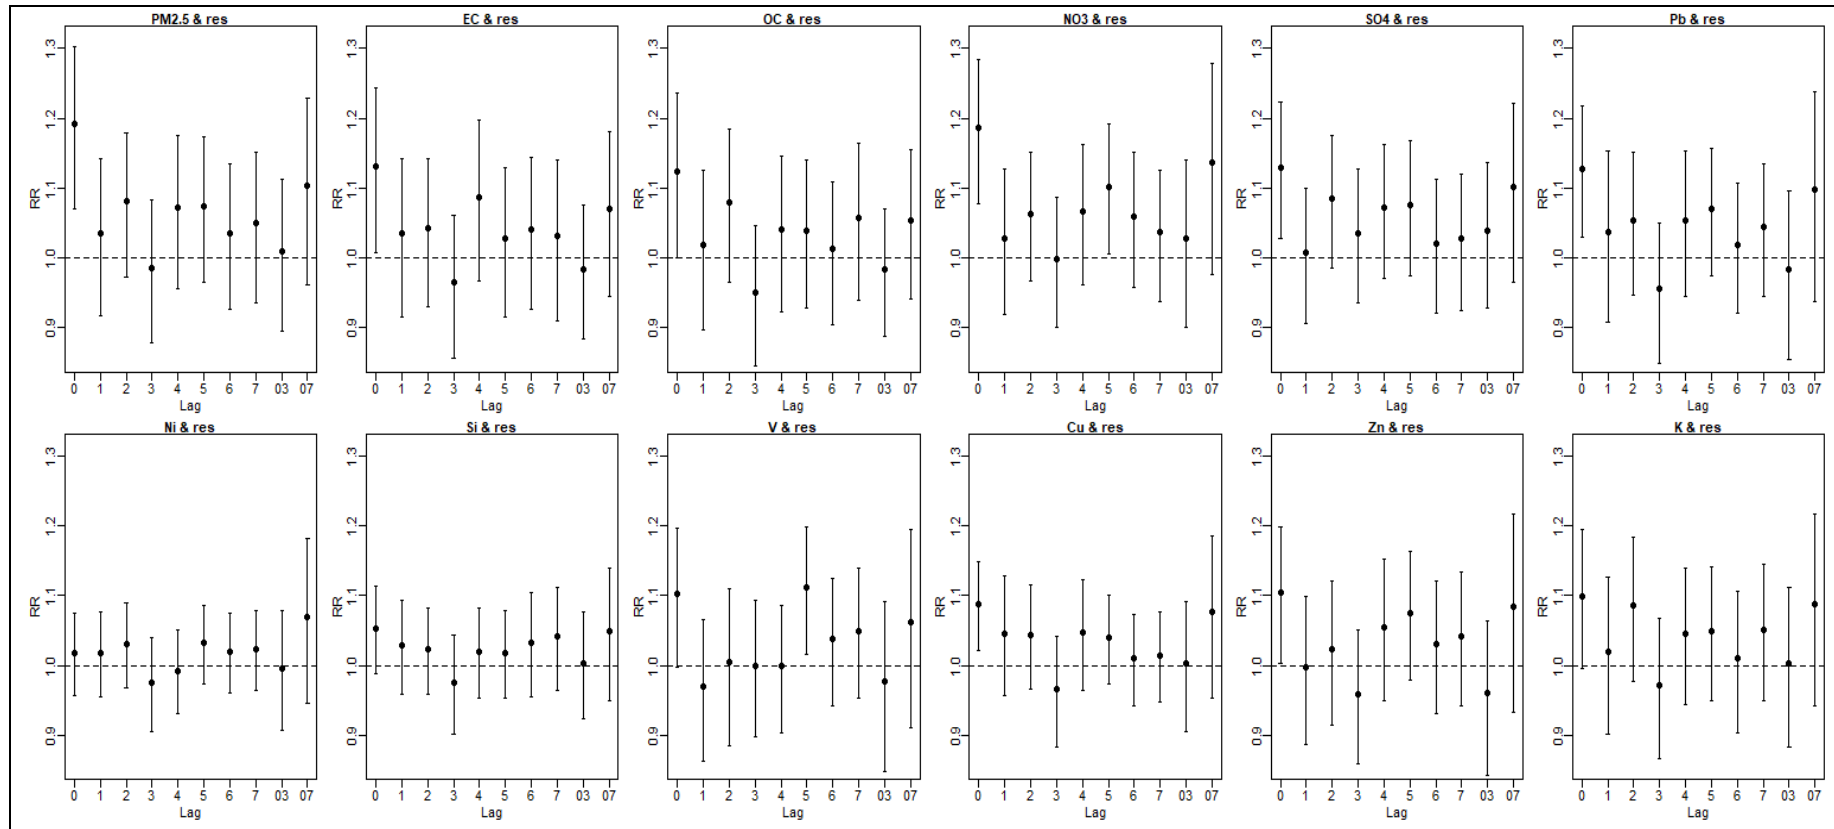

Daejeon

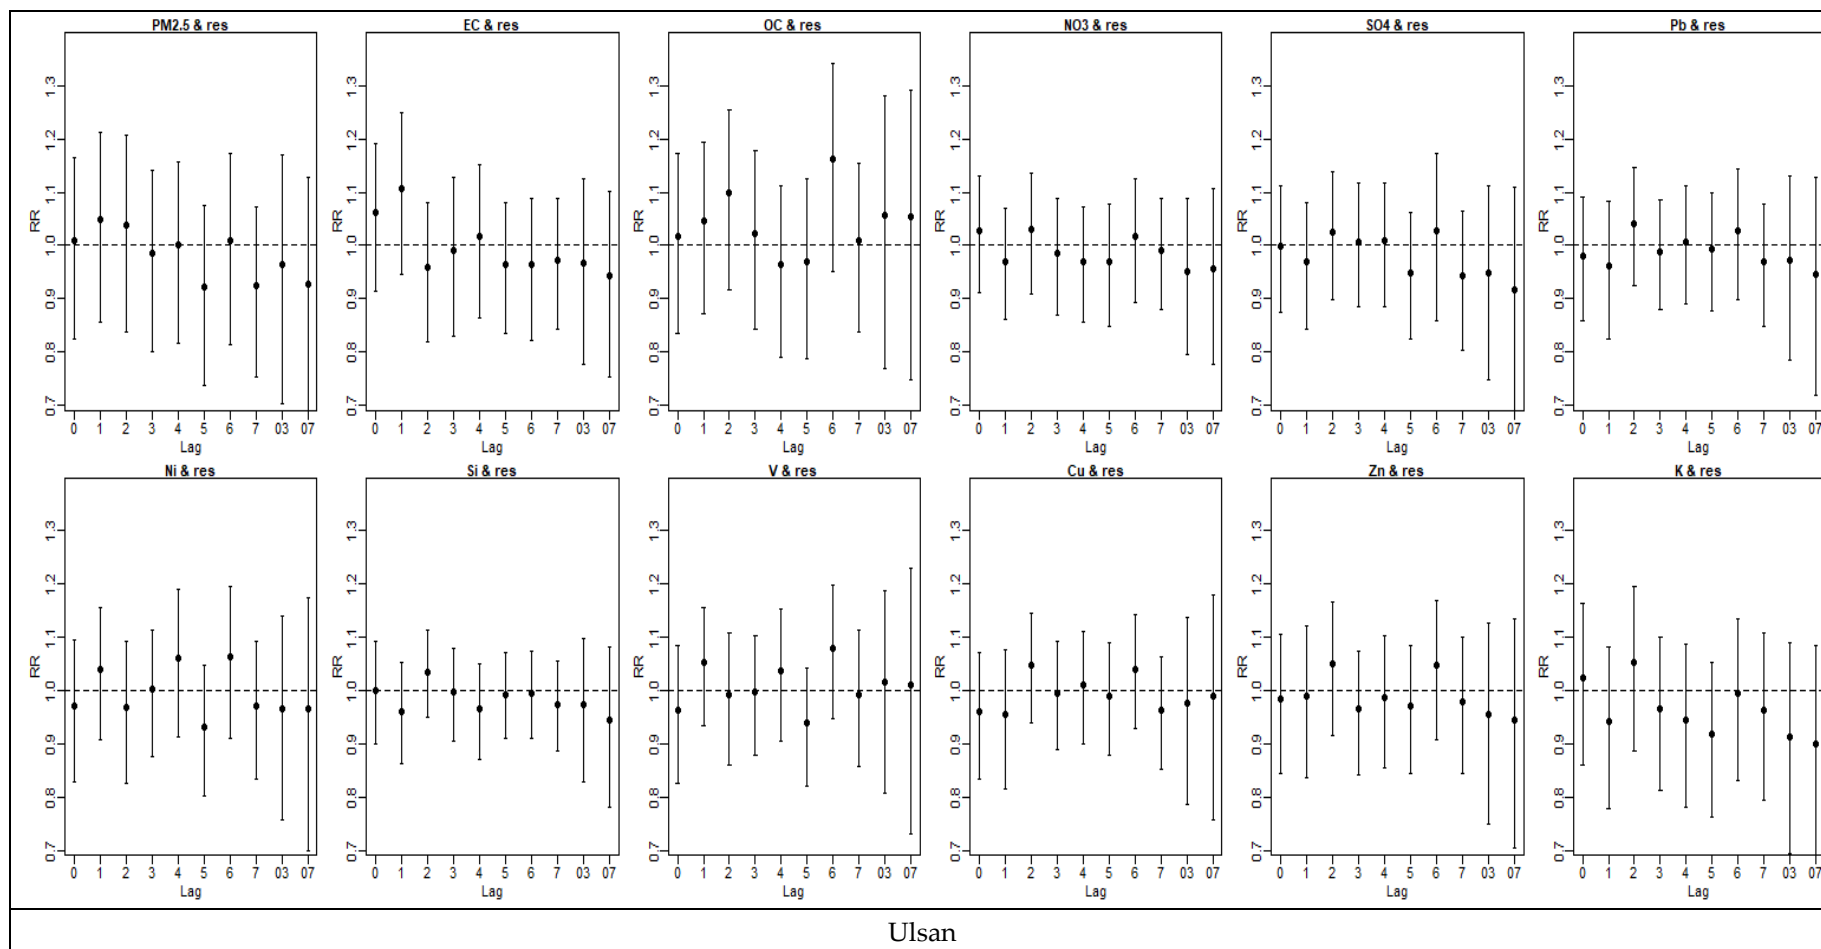

**Figure S2.** Relative risks (RRs) and 95% confidence intervals of daily mortality for interquartile range increases in daily concentrations of PM<sub>2.5</sub> and 11 PM<sub>2.5</sub> components across seven single-day lags (lag 0 to lag 7) and two multiday lags (lag 0–3 and lag 0–7), in each of the six South Korean major cities from 2013 to 2015.

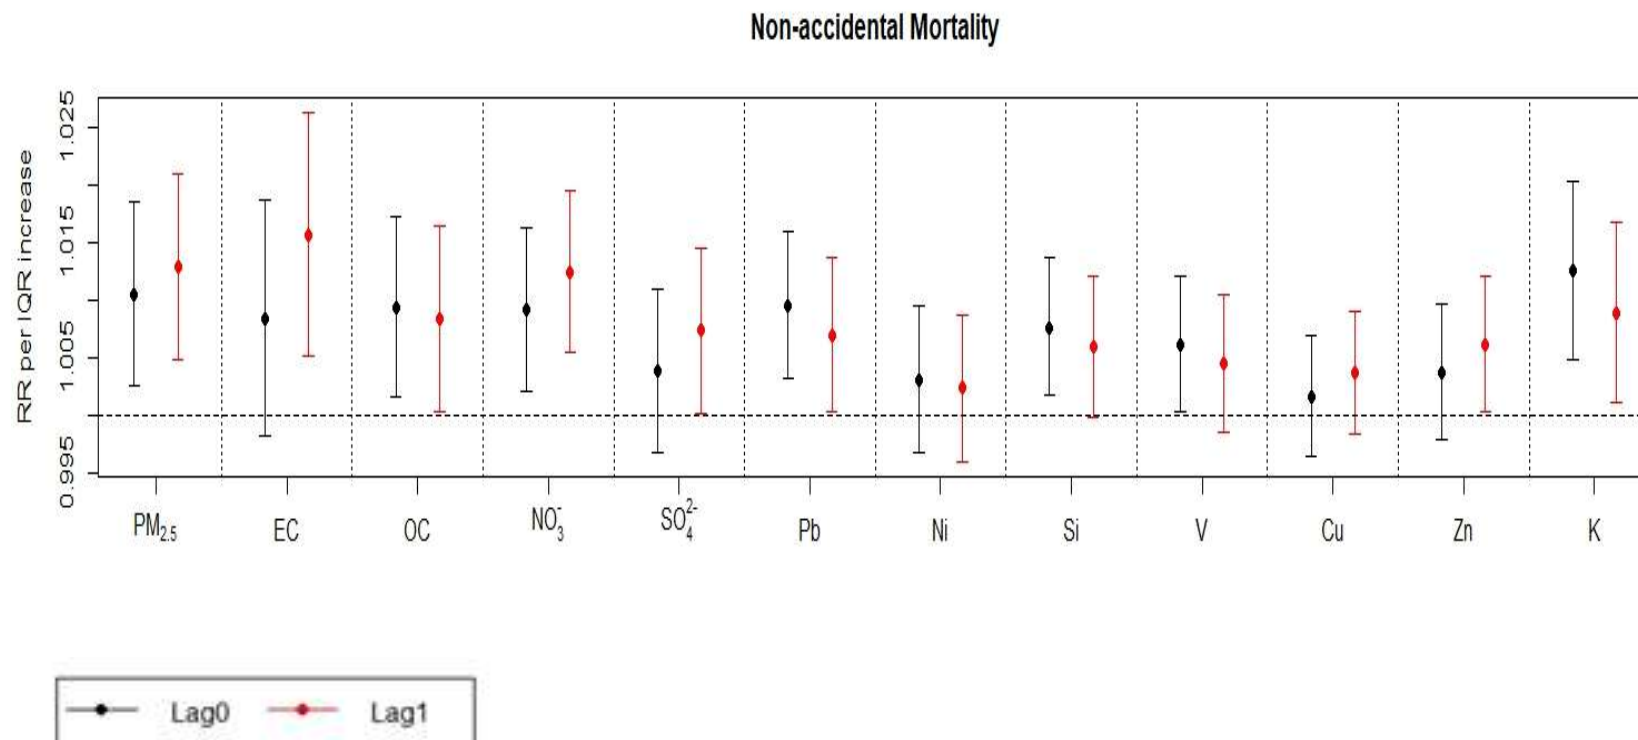

**Figure S3.** Relative risks (RRs) and 95% confidence intervals of daily nonaccidental mortality for interquartile range increases in daily concentrations of PM<sub>2.5</sub> and 11 PM<sub>2.5</sub> chemical components over all six South Korean major cities from 2013 to 2015.

### A. Non-accidental mortality

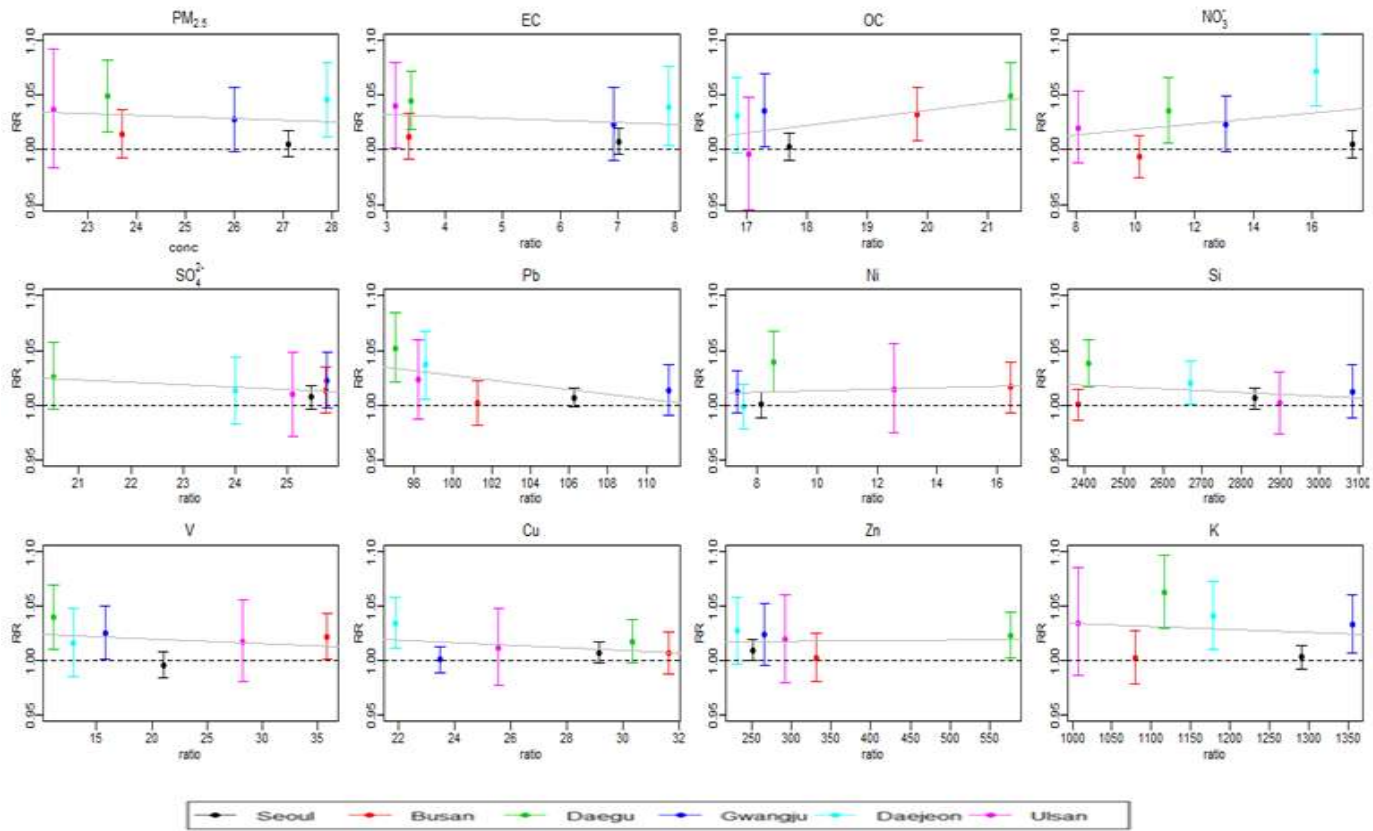



## B. Cardiovascular mortality

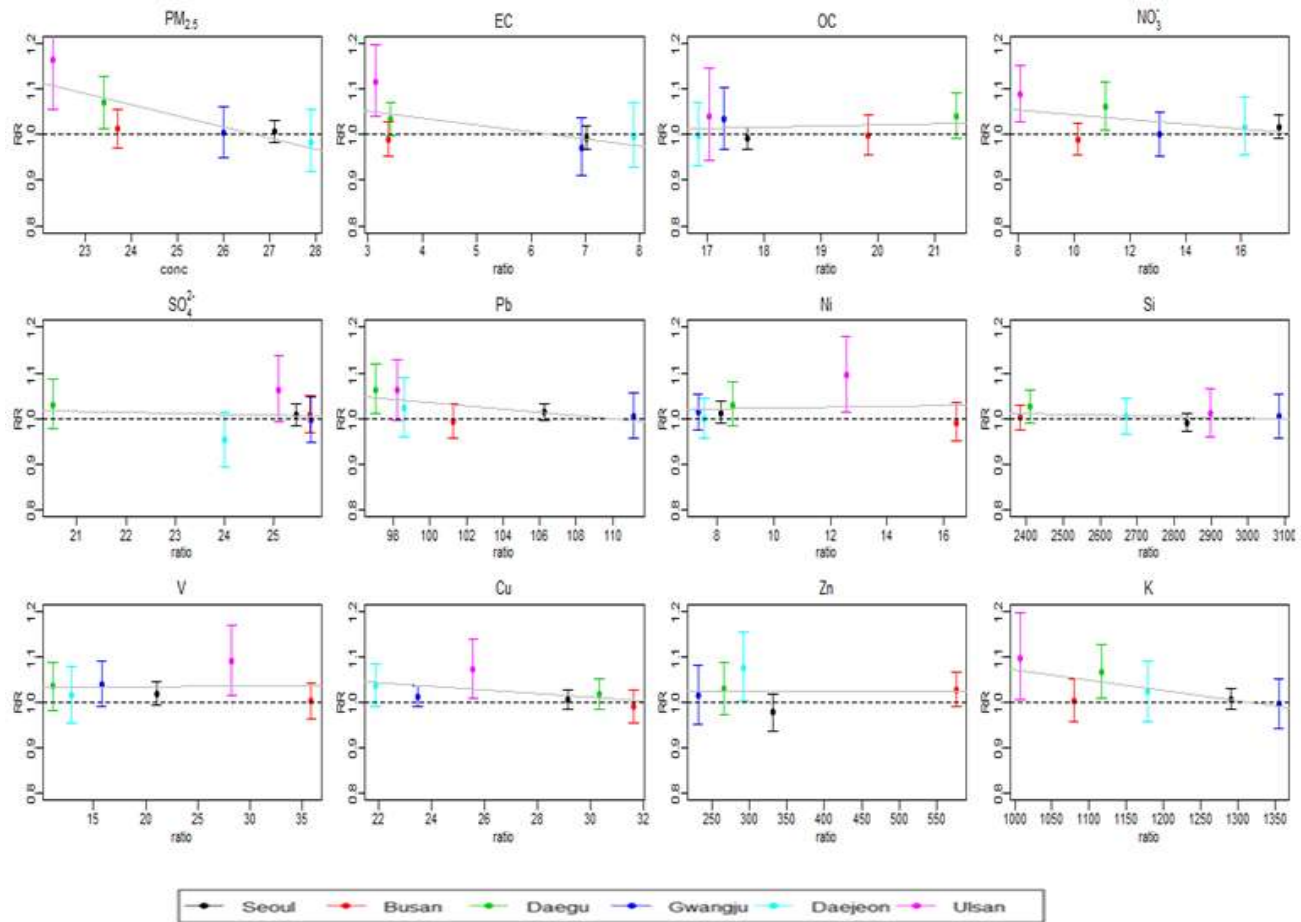

### C. Respiratory mortality

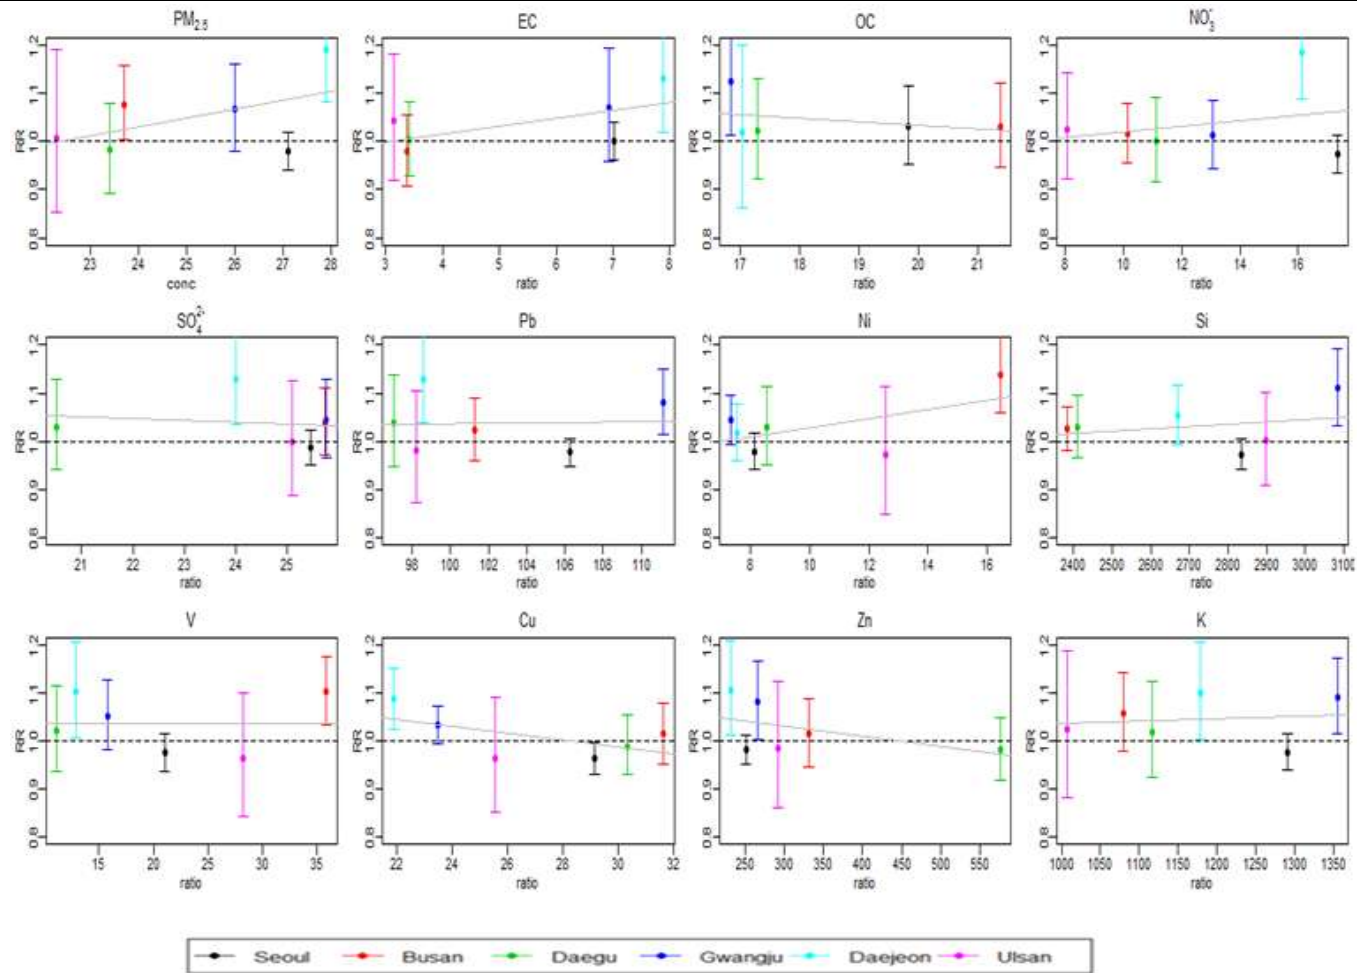

**Figure S4.** Relative risks (RR)s and 95% confidence intervals (CIs) of mortality for PM<sub>2.5</sub> components against the ratios of PM<sub>2.5</sub> component concentrations to PM<sub>2.5</sub> concentrations across six South Korean major cities from 2013 to 2015 (ratio = 100 X PM<sub>2.5</sub> component concentration/PM<sub>2.5</sub> concentration; for PM<sub>2.5</sub>, RRs were plotted against concentrations).

A. Non-accidental mortality

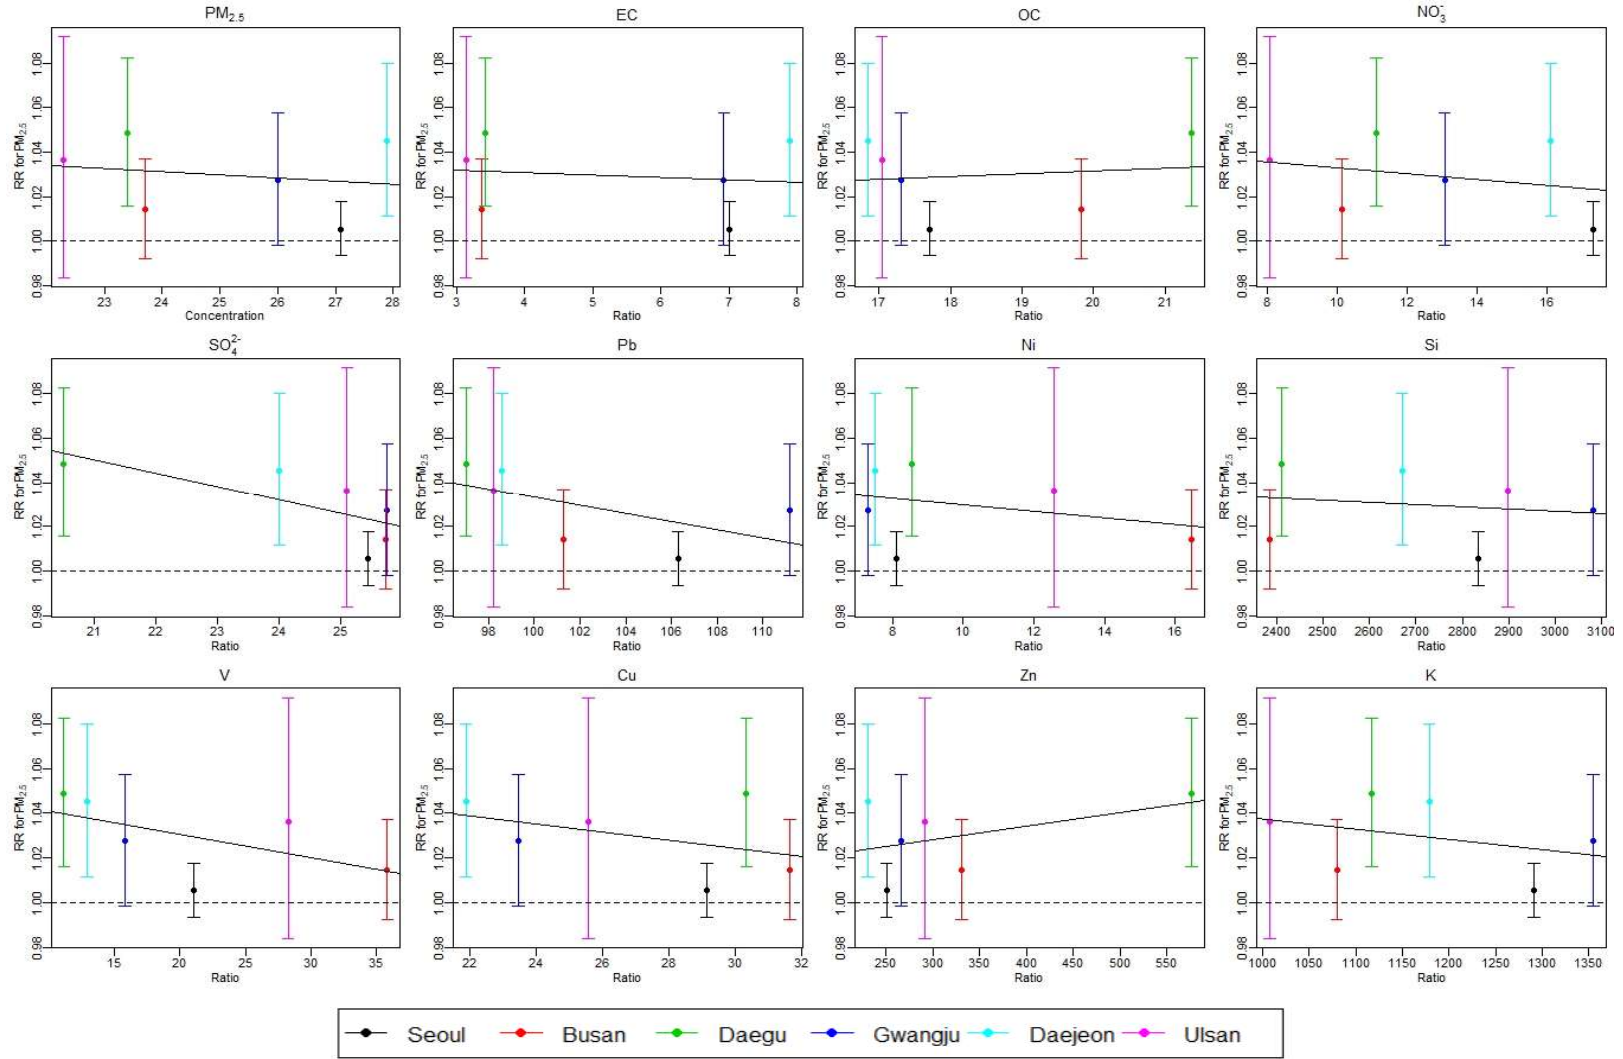

B. Cardiovascular mortality

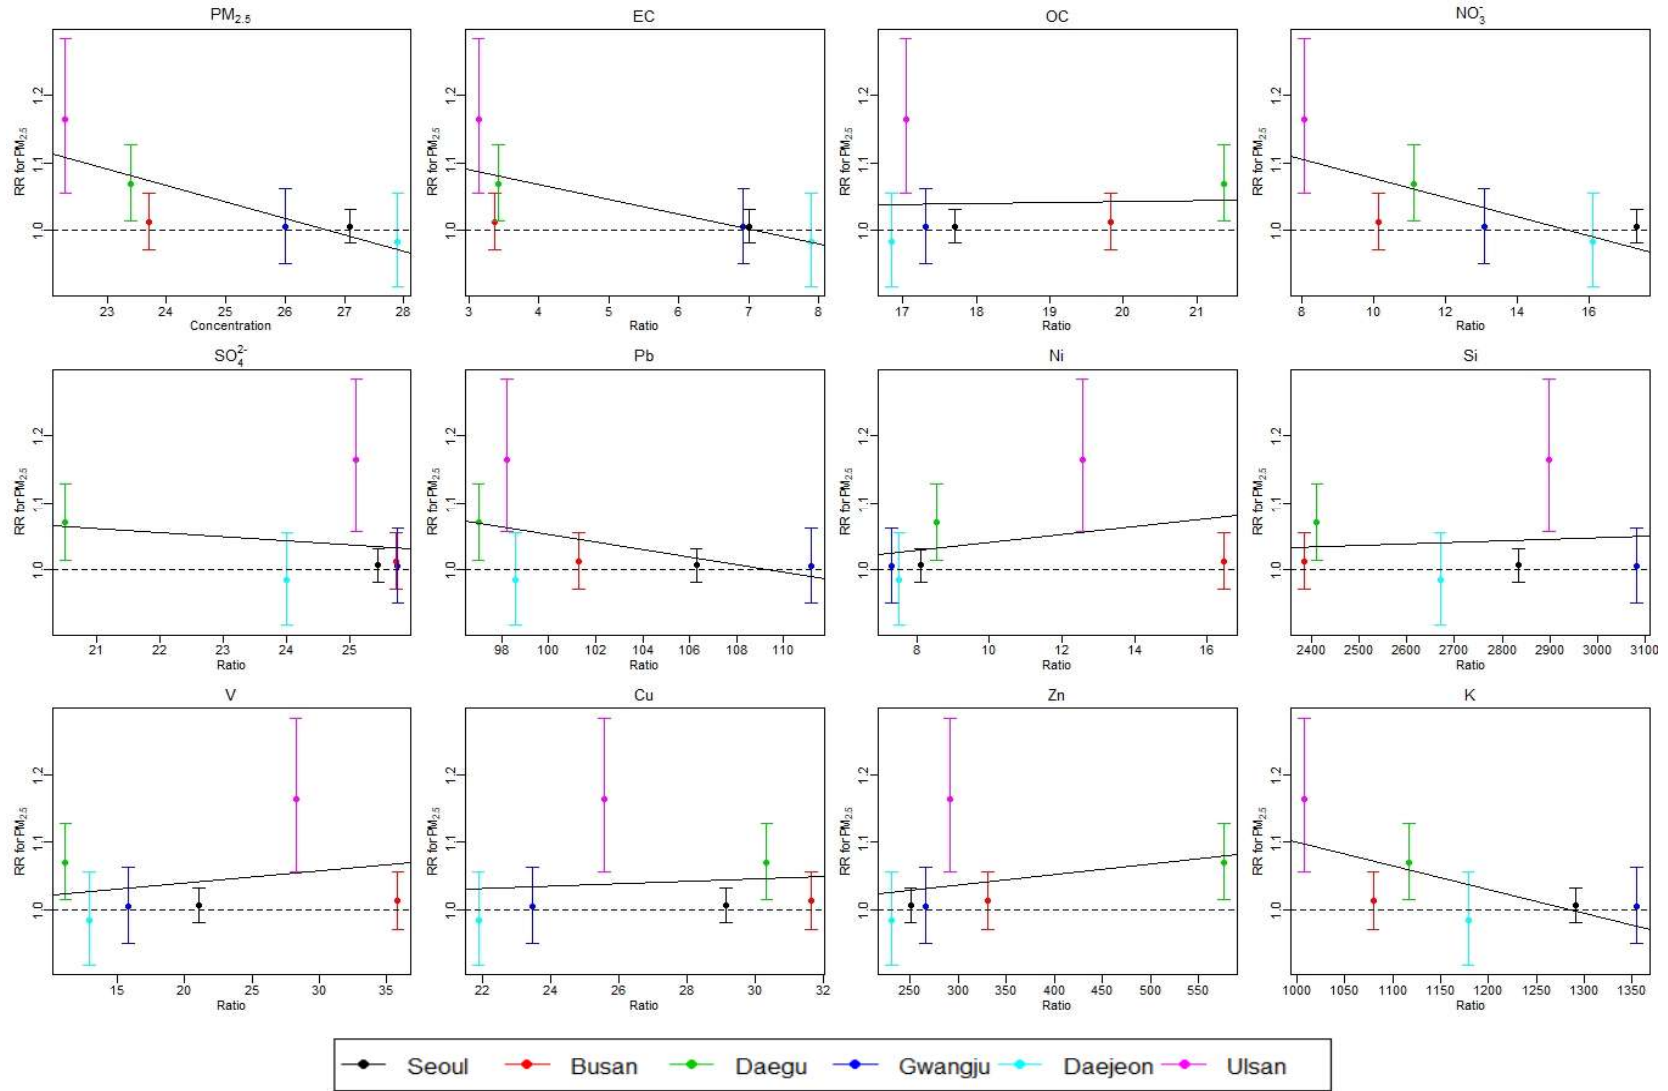

### C. Respiratory mortality

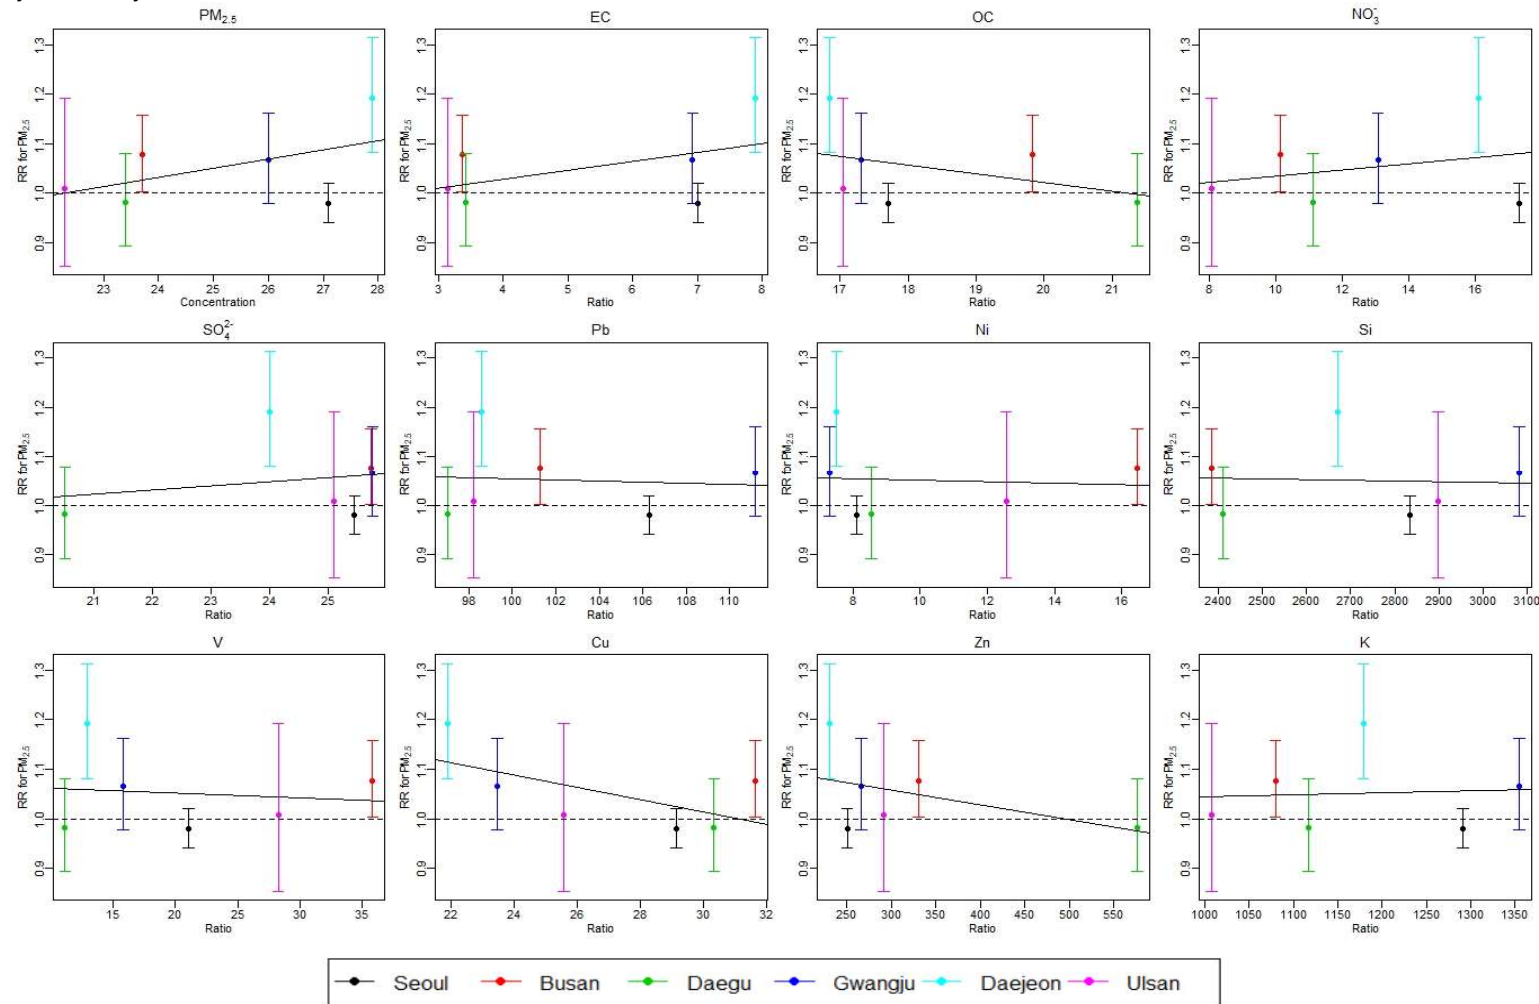

**Figure S5.** Relative risks (RR)s and 95% confidence intervals (CIs) of nonaccidental mortality for PM<sub>2.5</sub> against the ratios of PM<sub>2.5</sub> component concentrations to PM<sub>2.5</sub> concentrations across six South Korean major cities from 2013 to 2015 (ratio = 100 X PM<sub>2.5</sub> component concentration/PM<sub>2.5</sub> concentration; for PM<sub>2.5</sub>, RRs were plotted against concentrations).

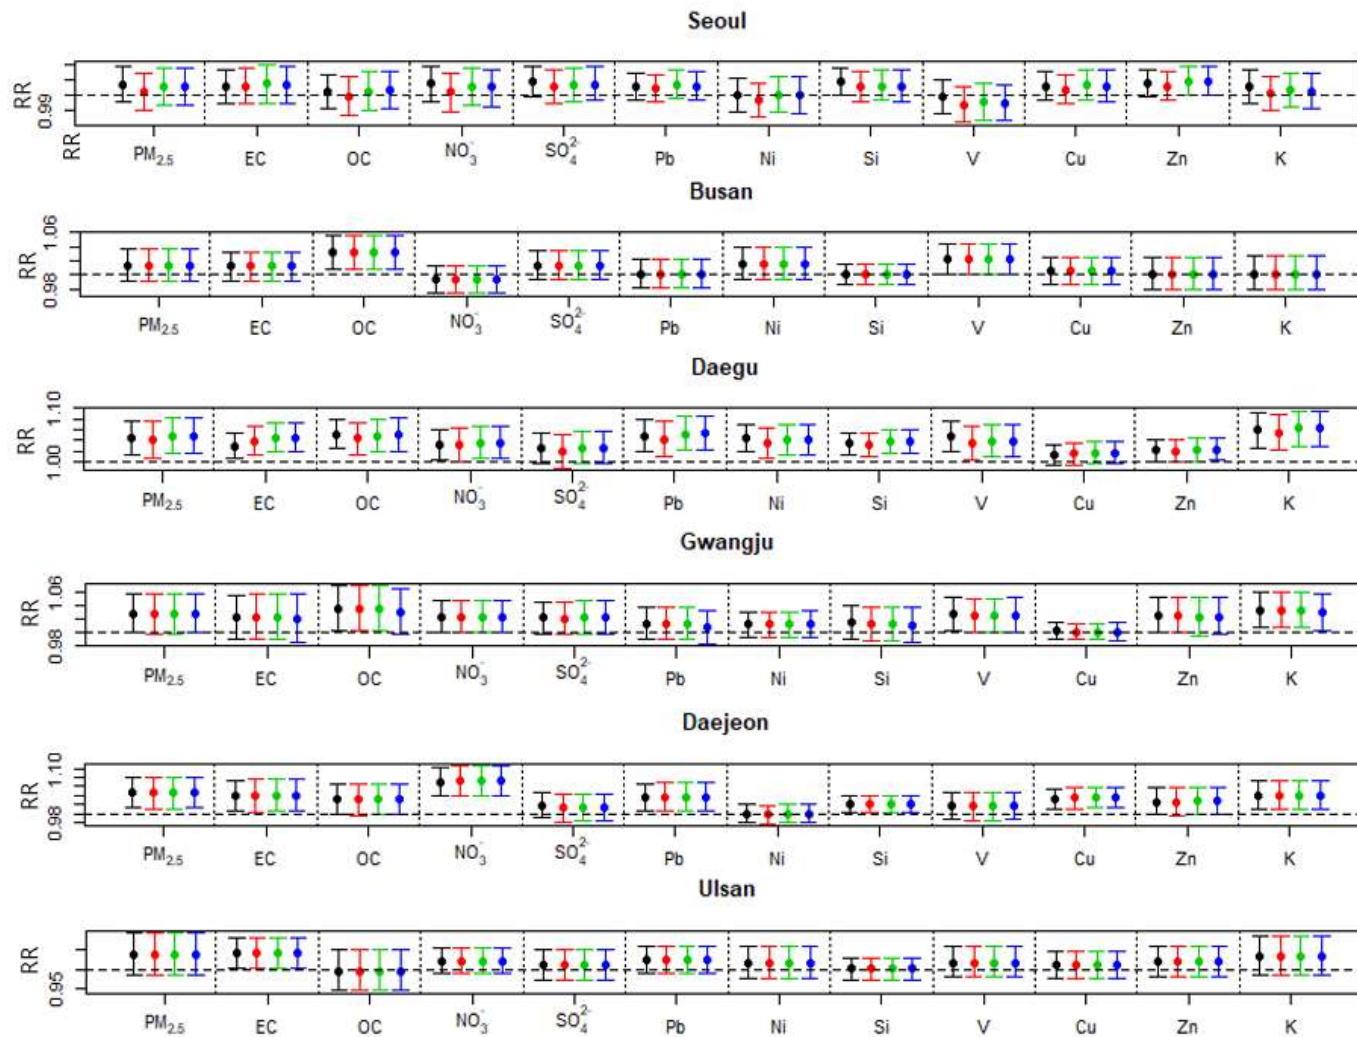

**Figure S6.** Relative risks (RRs) and 95% confidence intervals of nonaccidental mortality for 11 PM<sub>2.5</sub> components by different degrees of freedom (df) used for temporal trend adjustment (our primary model with df 6 per year) (black, red, green, green, and blue for df 2, 4, 6, and 12).

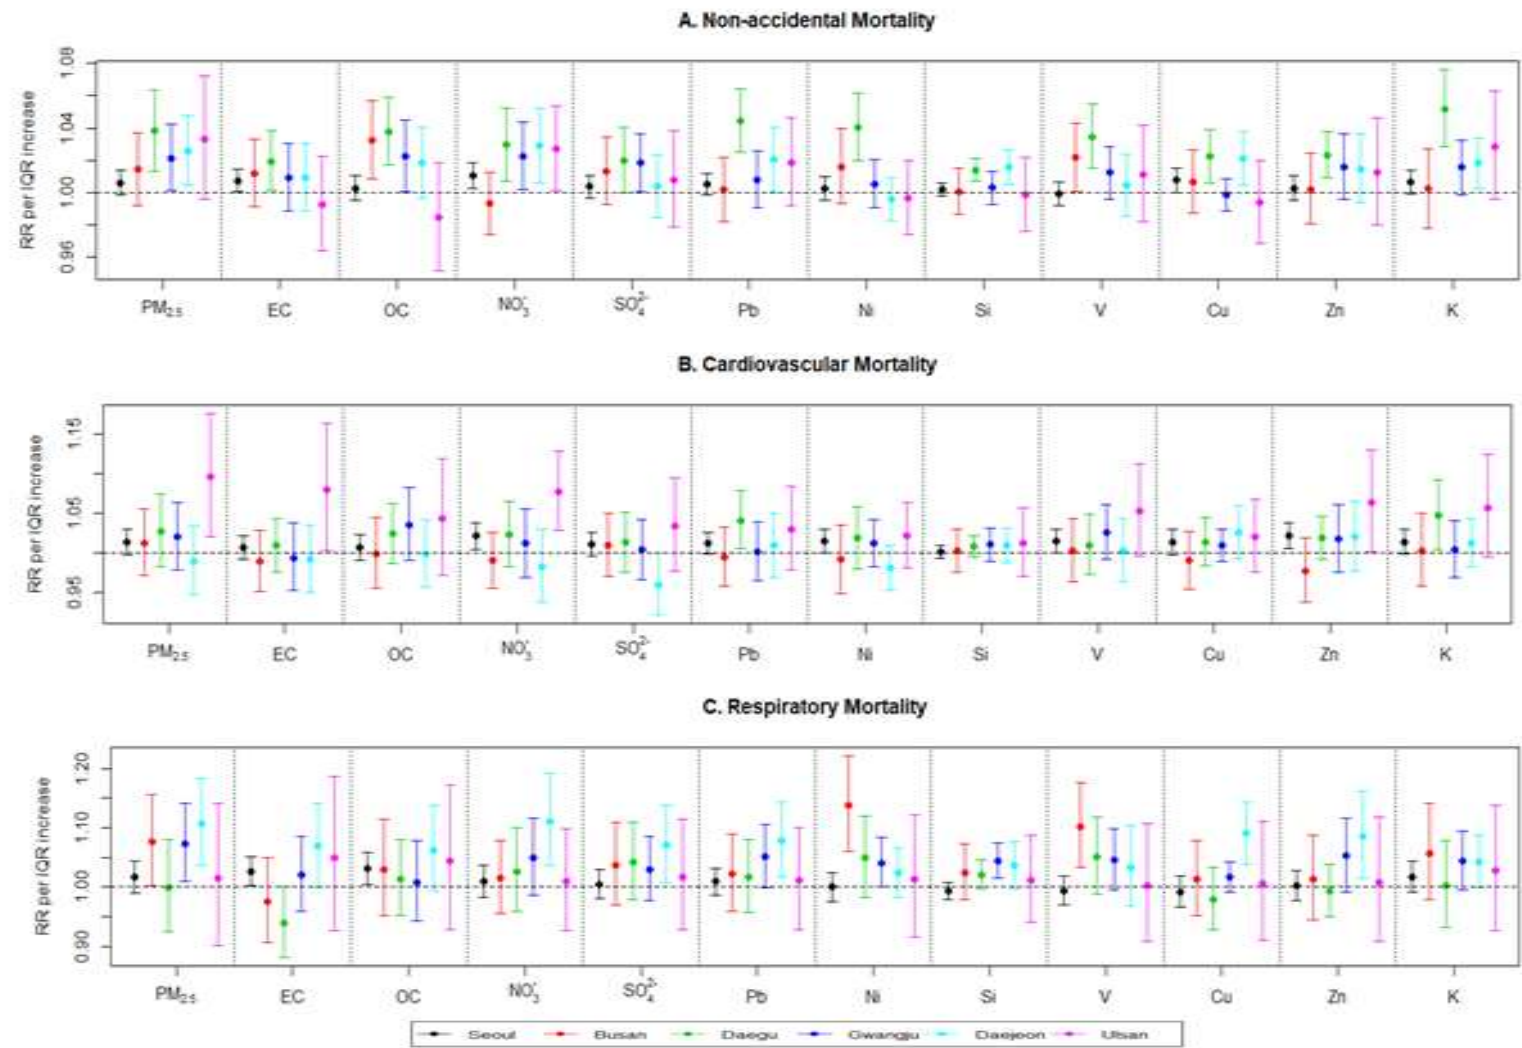

**Figure S7.** Relative risks (RRs) and 95% confidence intervals of daily mortality for interquartile range increases in daily concentrations of PM<sub>2.5</sub> and 11 PM<sub>2.5</sub> components for all available years between 2011 and 2015.
